1 One-time Nitrogen Fertilization Shifts Switchgrass Soil Microbiomes within a Context of Larger  
2 Spatial and Temporal Variation

3  
4 Huaihai Chen<sup>1</sup>, Zamin K. Yang<sup>1</sup>, Dan Yip<sup>1</sup>, Reese H. Morris<sup>1</sup>, Steven J. Lebreux<sup>1</sup>, Melissa A.  
5 Cregger<sup>1</sup>, Dawn M. Klingeman<sup>1</sup>, Dafeng Hui<sup>2</sup>, Robert L. Hettich<sup>3,5</sup>, Steven W. Wilhelm<sup>5</sup>,  
6 Gangsheng Wang<sup>4,6</sup>, Frank E. Löffler<sup>1,5</sup>, and Christopher W. Schadt<sup>1,5,\*</sup>

7  
8 <sup>1</sup>Biosciences Division, Oak Ridge National Laboratory; <sup>2</sup>Department of Biological Sciences,  
9 Tennessee State University; <sup>3</sup>Chemical Sciences Division, Oak Ridge National Laboratory;  
10 <sup>4</sup>Environmental Science Division, Oak Ridge National Laboratory; <sup>5</sup>Department of  
11 Microbiology, University of Tennessee; <sup>6</sup>Institute for Environmental Genomics and Department  
12 of Microbiology & Plant Biology, University of Oklahoma

13  
14 Short title: Short-term Nitrogen Effects on Switchgrass Soil Microbiomes

15 Type of Contribution: Full-Length Research Paper

16 Number of Tables: 2

17 Number of Figures: 8

18 Number of Supplementary Figures: 2

19  
20 \*Corresponding Author: Christopher W. Schadt, Biosciences Division, Oak Ridge National  
21 Laboratory, 1 Bethel Valley Rd, Oak Ridge, TN 37831, USA

22 E-mail: schadtcw@ornl.gov

23

24 *NOTE TO PUBLISHER: This manuscript has been authored by UT-Battelle, LLC under*  
25 *Contract No. DE-AC05-00OR22725 with the U.S. Department of Energy. The United States*  
26 *Government retains and the publisher, by accepting the article for publication, acknowledges*  
27 *that the United States Government retains a non-exclusive, paid-up, irrevocable, world-wide*  
28 *license to publish or reproduce the published form of this manuscript, or allow others to do so,*  
29 *for United States Government purposes. The Department of Energy will provide public access to*  
30 *these results of federally sponsored research in accordance with the DOE Public Access Plan*  
31 *(<http://energy.gov/downloads/doe-public-access-plan>).*

32 **Abstract**

33 Soil microbiome responses to short-term nitrogen (N) inputs within the context of existing  
34 spatio-temporal variability remain uncertain. Here, we examined soil bacterial and fungal  
35 communities pre/post-N fertilization in an 8 year-old switchgrass field, in which twenty-four  
36 plots received N fertilization at three levels (0, 100, and 200 kg N ha<sup>-1</sup> as NH<sub>4</sub>NO<sub>3</sub>) for the first  
37 time since planting. Soils were collected at two depths, 0-5 and 5-15 cm, for DNA extraction and  
38 amplicon sequencing of 16S rRNA genes and ITS regions, and soil metagenomic analysis.  
39 Baseline assessment prior to fertilization revealed no pre-existing differences in either bacterial  
40 or fungal communities across plots. The one-time N fertilization increased switchgrass yields  
41 and tissue N content, and the added N was nearly completely removed from the soil of fertilized  
42 plots by the end of the growing season. Both bacterial/archaeal and fungal communities showed  
43 large spatial (by depth) and temporal variation (by season) within each plot, accounting for 17  
44 and 12-22 % of the variation in bacterial/archaeal and fungal community composition,  
45 respectively. While N fertilization effects accounted for only ~4% of overall variation, some  
46 specific microbial groups, including the bacterial genus *Pseudonocardia* and the fungal genus  
47 *Archaeorhizomyces*, were notably repressed by fertilization at 200 kg N ha<sup>-1</sup>. Bacterial groups  
48 varied with both depth in the soil profile and time of sampling, while temporal variability shaped  
49 the fungal community more significantly than vertical heterogeneity in the soil. Thus, variability  
50 within the field might override the changes induced by N addition. Continued analyses of these  
51 trends over time with fertilization and management are needed to understand whether these  
52 transient effects change over time.

53

## 54 **Introduction**

55 Cultivation of dedicated bioenergy crops is of interest to sustain long-term energy supplies [1].  
56 The International Energy Agency predicts that biofuels could satisfy more than a quarter of  
57 world needs for transportation energy by 2050 [2]. Switchgrass (*Panicum virgatum* L.) has been  
58 a prominent candidate as an energy crop due to its high biomass yield, low maintenance and  
59 limited-input requirements [3], and high adaptability to marginal sites [4]. Such characteristics  
60 may allow switchgrass for its use to reclaim degraded or abandoned agricultural lands while  
61 reserving fertile lands for food production [5]. With its well developed and deep rooting systems,  
62 switchgrass may also improve belowground carbon storage and nutrient acquisition [6] and  
63 potentially moderate the diversity of below-ground and plant-associated microbiomes. Thus, how  
64 switchgrass cultivation affects soil microbial communities and their interaction with crop yields  
65 needs further investigation to understand the long-term ecosystem consequences and  
66 sustainability of the cultivation of perennial crops, such as switchgrass.

67 Soil microbial communities play fundamental roles in terrestrial ecosystems, such as  
68 regulating the decomposition of organic matter as well as driving nutrient cycles and energy flow  
69 [7, 8]. To this end, these microbiomes have considerable effects on soil quality and agricultural  
70 sustainability [9]. However, soil management with fertilizer additions may shift soil microbial  
71 abundance and composition as well as functions by affecting soil physical and chemical  
72 characteristics [10]. For example, laboratory studies showed that N addition depresses soil  
73 microbial activity, microbial biomass, and enzyme activities by shifting the metabolic  
74 capabilities of soil bacterial communities toward the decomposition of more labile soil carbon  
75 pools [11]. In addition, nutrient inputs have been shown to shift the composition of soil microbial  
76 communities in consistent ways in grasslands across the globe with reduced average genome

77 sizes of microbial communities following nutrient amendment, leading to decreased relative  
78 abundances of some important microbial functional groups, such as methanogenic archaea,  
79 oligotrophic bacteria and mycorrhizal fungi [12]. Several reasons may account for such  
80 microbial responses to fertilization. Fertilization may cause soil acidification, and thus alter soil  
81 microbial diversity and composition [10, 13]. Additionally, nutrient amendments may have direct  
82 effects on organic matter decomposition, leading to changes in the quantity and quality of  
83 resources available for microbes, and therefore reshape microbial community structure based on  
84 their substrate utilization preferences [14]. However, our understanding of the mechanisms of N  
85 fertilization effects on microbial communities are mostly based on long-term fertilization, in  
86 which edaphic soil properties have likely been significantly altered by soil management over  
87 time. Although transient nutrient enrichment effects upon terrestrial microbial C and N processes  
88 have been reported [15-17], our understanding of the immediate response of the below-ground  
89 microbial community to N inputs is still limited, and sometimes inconsistent with results of long-  
90 term experimental data [18-20]. Additional research is thus necessary to evaluate microbial  
91 community dynamics and their interactions with nutrient cycling under the no-, low- or periodic  
92 fertilization regimes that would be optimal for sustainable perennial bioenergy crop production  
93 scenarios [21, 22].

94 Besides soil nutrient availability, soil microbial distribution is influenced by a wide range of  
95 soil characteristics, such as soil pH, substrate quantity and quality, moisture and oxygen levels,  
96 nearly all of which could typically change with soil depth [23] and vary over seasons [24]. Soil  
97 depth and measuring time in a growing season thus influence patterns of spatial and temporal  
98 community variation [25, 26]. Compared to top soil, subsurface soils have higher mineral  
99 content, less aeration, and lower organic carbon availability. Thus, microbial biomass and

100 diversity typically decrease rapidly with depth in the soil profile [27]. Often, most variability in  
101 microbial community composition occurs in surface soils, while deeper soils have more similar  
102 communities regardless of soil management [23]. Seasonal variability also has a large influence  
103 on microbial communities [28]. For example, seasonal changes of temperature and soil moisture  
104 can directly shape microbial communities [29, 30]. Moreover, seasonal changes in plant growth  
105 and allocation can indirectly affect soil C inputs [31, 32]. Lauber et al. [24] investigated the  
106 temporal variability of bacterial communities in different ecosystems, showing that most of the  
107 temporal variation in bacterial composition within an agricultural field could be explained by soil  
108 moisture and temperature variations. Given these previous studies, it is possible that the shifting  
109 spatial and temporal patterns of soil microbial communities may overwhelm short-term soil  
110 nitrogen management effects and needs to be accounted for in such assessments.

111 Here, we used high-throughput barcoded sequencing to assess short-term effects of one-time  
112 N fertilization on the spatio-temporal variation of soil microbial communities in an 8 year-old  
113 switchgrass field, over two soil depths and across four sampling seasons. We hypothesized that (1)  
114 one-time nutrient inputs could significantly change above-ground plant yields and substrate quality,  
115 and re-shape soil bacterial and fungal communities, but that short term N effects would be modest  
116 compared to existing spatio-temporal variation, (2) bacterial and fungal composition would differ  
117 spatially and temporally, but the response of these communities to the N-fertilization would be  
118 taxon specific.

119

## 120 **Materials and Methods**

### 121 **Site characterization, experimental design and plant and soil sampling**

122 The experiment was established in an eight year-old switchgrass field near the Heritage Center,  
123 located on US DOE land, in Oak Ridge, Tennessee, USA (35.9255 N, 84.3947 W). The 10-year  
124 mean annual temperature and annual precipitation at the site were 14.1°C and 1436 mm,  
125 respectively. The field was in pasture and hay rotations when taken over by DOE in the 1940s  
126 during the Manhattan Project. However, due to proximity of floodplain of the Clinch River and  
127 Poplar Creek, the land was never developed and instead maintained as wildlife habitat and  
128 riparian buffer as a field of mixed grasses and forbs, using a combination of mowing and  
129 prescribed burning. In 2009, under contract for UT Institute of Agriculture and Genera Energy,  
130 the site was cleared, seeded, and subsequently managed for switchgrass production. After the  
131 contract expired in 2012, the site remained in switchgrass, but has again been managed as buffer  
132 and wildlife habitat, and maintained only with periodic prescribed fire and mowing. In mid-  
133 December 2016, the switchgrass field was mowed to a 10-cm stubble height and twenty four  
134 plots (5 m × 5 m) were set up including three N fertilization levels (0, 100, and 200 kg N ha<sup>-1</sup>)  
135 with eight replicates based on a complete randomized design (Fig. 1). A 2.5-m inter-plot “alley  
136 way” was periodically mowed to allow access and separate the plots between treatments and  
137 replicates. Just before spring emergence of the switchgrass (March 30, 2017) commercial  
138 ammonium nitrate (34% nitrogen) was hand-applied to fertilizer-treated plots with N fertilization  
139 levels of 100, and 200 kg N ha<sup>-1</sup>. Post-emergence (June 20, 2017), all plots were treated with  
140 Garlon 3A herbicide as prescribed by the manufacture to help control broadleaf weeds. After fall  
141 senescence (November 13, 2017) above-ground biomass of switchgrass was measured [33] using  
142 a sickledrat to harvest all aboveground biomass from a 0.1 m<sup>2</sup> area at four randomly chosen  
143 locations in each plot. The four samples of aboveground biomass were pooled by plot in paper  
144 bags, oven dried at 70° C, and weighed to determine dry mass per unit area. A subsample of the

145 plant material was then ground into powder using a laboratory mill before total C and N were  
146 determined by dry combustion method using a Perkin-Elmer 2400 CHN analyzer (Perkin-Elmer  
147 Corporation, Norwalk, CT, USA).

148 For soil DNA and chemical characterization, four sets of soil samples were collected across  
149 seasons including Winter 2016 (December 16, 2016), Spring 2017 (April 5, 2017), Summer 2017  
150 (July 5, 2017), and Late Fall 2017 (November 15, 2017). At each sampling event, soil cores (2.5  
151 cm diameter × 15 cm height) were collected randomly from each plot and separated into two  
152 depth increments of 0-5 and 5-15 cm. Soils collected in Winter 2016 (before N fertilization) were  
153 used to assess soil microbiomes and metagenomes, and check whether there was systematic pre-  
154 existing differences of microbial communities across plots. Soils collected following N  
155 fertilization, *i.e.*, Spring 2017, Summer 2017, and Late fall 2017, were used to compare  
156 difference in microbial communities among N treatments. Soil collected for all four seasonal  
157 samplings was used to assess how soil depth and sampling seasons affected microbial  
158 communities across all three nitrogen treatments. All soil samples for microbial analyses were  
159 transported on dry ice to the lab and stored at -80° C prior to soil DNA extraction. Total C and N  
160 were determined on samples collected in the Summer of 2017 using the dry combustion method  
161 and soil inorganic N ( $\text{NH}_4^+\text{-N}$  and  $\text{NO}_3^-\text{-N}$ ) was analyzed using a FIA QuikChem 8000  
162 autoanalyzer (Lachat Instruments, Loveland, CO, USA). Generally, 0-5 cm soils had 4.5% soil  
163 total C, 0.2% soil total N, 10.2 mg kg<sup>-1</sup>  $\text{NH}_4^+$ , and 1.3 mg kg<sup>-1</sup>  $\text{NO}_3^-$ , while 5-15 cm soil had  
164 significantly lower 1.8% soil total C, 0.03% soil total N, 1.8 mg kg<sup>-1</sup>  $\text{NH}_4^+$ , and 0.3 mg kg<sup>-1</sup>  
165  $\text{NO}_3^-$ .

166

167 **DNA extraction, rRNA gene amplicon sequencing, and metagenomic sequencing**



168 Approximately 10 g of soil from each sample was homogenized in a mortar and pestle with  
169 liquid N<sub>2</sub>, and soil DNA was extracted from a 0.25 g aliquot of the soil sample using the MoBio  
170 DNeasy PowerSoil Kit (Qiagen, Carlsbad, CA, USA) according to the manufacturer's  
171 instructions. DNA concentrations were determined and purity was confirmed by the ratio of  
172 absorbance at 260 and 280 nm (1.70-1.90) using a NanoDrop 1000 spectrophotometer  
173 (NanoDrop Products, Wilmington, DE, USA).

174 A two-step PCR approach was used to barcode tag templates with frameshifting nucleotide  
175 primers for amplicon sequencing [34] with some modifications previously described [35]. To  
176 increase phylogenetic coverage for community analysis of bacteria, archaea, and fungi, a group  
177 of nine forward and six reverse primers for bacteria and archaea, and another group of eleven  
178 forward and seven reverse primers for fungi, mixed at equal concentration of 0.5 μM were used  
179 to target 16S rRNA V4 region and fungal ITS2 rRNA, respectively [35]. Primary PCR was  
180 conducted for 5 cycles of 1 min at 95 °C, 2 min at 50 °C, and 1 min at 72 °C, followed by a final  
181 elongation of 5 min at 72 °C. This PCR product was then cleaned up using Agencourt AMPure  
182 beads (Agencourt Bioscience, Beverly, MA, USA) and eluted in 21 μL of nuclease-free water.  
183 To tag amplicons with barcoded reverse primers and forward primers, 20 μL of purified DNA  
184 fragments from the primary PCRs were added to 50 μL secondary PCR assays, which were  
185 initiated at 95 °C for 45 sec, followed by 32 cycles of 15 sec at 95 °C, 30 sec at 60 °C, and 30 sec  
186 at 72 °C, followed by a final elongation of 30 sec at 72 °C. The use of separate tagging reactions  
187 can help reduce heterodimers because PCR clean-up more efficiently removes shorter primers  
188 [34]. Up to ninety six secondary PCR products were then pooled based on agarose gel band  
189 intensity, followed by a second clean-up with Agencourt AMPure beads (Agencourt Bioscience,  
190 Beverly, MA, USA) using 0.7-1 of bead-to-DNA ratios. The mixtures of the purified 16S rRNA

191 gene or ITS amplicon fragments were then paired-end sequenced on Illumina Miseq platform  
192 (250×2 paired end, v2 chemistry) (Illumina, San Diego, CA, USA) using a 9 pM amplicon  
193 concentration.

194 To examine microbial community potential and function prior at the site, DNA extracted  
195 from soil samples collected in Winter 2016 were pooled to form four composite samples.  
196 Specifically, for each of two soil depths, DNA from No. 1-12 and 13-24 plots was pooled  
197 together, respectively (two depth × two replicates). Shotgun metagenomes were prepared using  
198 Nextera XT sequencing libraries (Illumina, San Diego, CA) according to the manufacture's  
199 recommendations using 500ng of DNA (15031942 v03). Final libraries were validated on an  
200 Agilent Bioanalyzer (Agilent, Santa Clara, CA) using a DNA7500 chip and concentration was  
201 determined on an Invitrogen Qubit (Waltham, MA) with the broad range double stranded DNA  
202 assay. Barcoded libraries were pooled and prepared for sequencing following the manufactures  
203 recommended protocol (15039740v09, Standard Normalization). One paired end sequencing run  
204 (2 x 300) was completed on an Illumina MiSeq instrument (Illumina, San Diego, CA) using v3  
205 chemistry.

## 206 **Bioinformatic and Statistical Analyses**

207 Forward and reverse primers were trimmed with Cutadapt [36]. Paired-end sequencing data  
208 were then joined and demultiplexed using QIIME [37] with quality filter at Phred > 19. Chimeras  
209 of trimmed and filtered sequences were identified and removed using a usearch method in  
210 QIIME. Operational taxonomic units (OTUs) with 97% identity were picked with the open  
211 reference algorithm and usearch61 otu-picking method. Taxonomy was assigned using the RDP  
212 (Ribosomal Database Project) taxonomy-assignment method [38] against the most recent version  
213 of Greengenes database (13.8) for 16S rRNA sequencing data and UNITE database (12.11) for

214 ITS sequencing data. All global singletons were removed from the dataset. The 16S and ITS  
215 OTUs were further analyzed for alpha and beta diversity using QIIME. Metrics for analyzing  
216 beta diversity were Bray-Curtis distance. Bacterial community functional traits were predicted  
217 using PICRUSt (Phylogenetic Investigation of Communities by Reconstruction of Unobserved  
218 States) [39]. The Miseq sequences were deposited on NCBI Sequence Read Archive (SRA)  
219 database under the BioProject accession number of PRJNA512218.

220 Soil metagenome sequences were uploaded to Rapid Annotation using Subsystems  
221 Technology for Metagenomes (MG-RAST; <http://metagenomics.anl.gov>) [40] under project  
222 accession number mgp22000, and annotated using the RefSeq database for taxonomic  
223 assignment and the SEED Subsystems database for functional classification (maximum e-value  
224 cutoff was  $1e^{-5}$ , minimum identity cutoff was 60%, and minimum alignment length was 50).

225 One-way analysis of variance (ANOVA) of a completely randomized design (SAS 9.3, SAS  
226 Institute Inc. Cary, NC, USA) was used to assess significant differences in above-ground yields  
227 and plant C/N contents among N fertilization levels. A three-factor ANOVA of a completely  
228 randomized design was used to analyze microbial alpha diversity and the abundances of  
229 microbial taxonomic groups among the three N fertilization levels, two soil depths, and four  
230 seasonal samplings. Microbial beta diversity was compared using a three-factor PEMANOVA  
231 method (N fertilization levels, soil depths, and sampling season) with 9999 permutations  
232 conducted in PRIMER (Plymouth Routines in Multivariate Ecological Research Statistical  
233 Software, v7.0.13, PRIMER-E Ltd, UK). A RELATE analysis was also performed to evaluate  
234 the relatedness between bacterial and fungal beta diversity by calculating Spearman's Rho  
235 correlation coefficient in PRIMER. The DistLM (distance-based linear model) function in  
236 PRIMER was used to evaluate the associations of above-ground yields and plant C/N contents

237 with bacterial and fungal beta diversity [41]. Heat maps were constructed using HeatMapper [42]  
238 to represent all taxonomic groups at genus level that differed significantly ( $P < 0.05$ ) among  
239 three N fertilization levels, two soil depths, and four sampling times. Venn's diagrams were also  
240 constructed to visualize how many significantly affected bacterial/archaeal and fungal genera  
241 were shared between the factors of soil depth and sampling time using Venny 2.1.0 [43].  
242 Additionally, Pearson's correlation coefficients were examined to further evaluate relationships  
243 between the relative abundances of taxa and N fertilization rates.

244

## 245 **Results**

### 246 **Spatial variation in microbial community structure and function pre-nitrogen addition**

247 Both 16S rRNA gene and ITS region amplicon sequencing revealed no significant pre-existing  
248 differences in alpha or beta diversity in either the bacterial/archaeal or fungal communities  
249 across the 24 plots in this switchgrass field before N fertilization, however diverse  
250 bacterial/archaeal and fungal taxa were observed (Fig. 2). Bacterial communities varied  
251 significantly by depth ( $P < 0.05$ ) with the 0-5 cm soil layer having greater Planctomycetes (8%),  
252 Bacteroidetes (7%), and Verrucomicrobia (5%), but less abundant Proteobacteria (34%),  
253 Chloroflexi (5%), and Gemmatimonadetes (2%) than the deeper layers (Fig. 2). Surprisingly,  
254 fungal phyla did not show any differences between the soil depths examined in these switchgrass  
255 soils.

256 Shotgun metagenomes also showed high taxonomic and functional diversity in the  
257 switchgrass field (Fig. S1). However, when phylogenetic assignments of the metagenome reads  
258 were compared to the relative abundance in 16S rRNA gene amplicon analyses, soil  
259 metagenomes indicated significant differences in the datasets across several of the dominant

260 phyla. There was a 45% increase in Proteobacteria, a 15-fold increase in Firmicutes, and a 2-fold  
261 increase in Cyanobacteria in the shotgun metagenomes when compared to 16S rRNA gene  
262 amplicon analyses. Other phyla, such as Acidobacteria, Planctomycetes, and Chloroflexi, were  
263 reduced by 52-63% in soil metagenomes when compared to 16S rRNA gene amplicon analyses  
264 from the same samples and dates. Soil metagenome predicted functional gene profiles were  
265 compared to those predicted from PICRUST-based analysis of 16S rRNA gene amplicon data  
266 and indicated significantly different profiles (Fig. S2). As a result, PICRUST-based analyses of  
267 seasonal functional gene patterns and responses to fertilization were not pursued further.

268

### 269 **Microbial alpha and beta diversity post-nitrogen addition**

270 Although neither bacterial/archaeal nor the fungal alpha diversity were significantly affected by  
271 N fertilization levels, both the community richness (Chao1 index) and diversity (Shannon index)  
272 showed significant spatio-temporal changes ( $P < 0.05$ ) (Fig. 3). Between the two soil depths, the  
273 0-5 cm layer had significantly higher Chao1 richness and Shannon evenness indices in both the  
274 bacterial/archaeal and fungal communities compared to the 5-15 cm layer ( $P < 0.05$ ). In analyses  
275 of seasonal variation, Chao1 diversity showed a similar pattern. Spring 2017 had lower richness  
276 in the bacterial/archaeal community, while Winter 2016 and Fall 2017 had significantly greater  
277 richness in fungal communities ( $P < 0.05$ ). Shannon diversity indices showed significant  
278 divergence across seasons ( $P < 0.05$ ), and the bacterial/archaeal community was more evenly  
279 distributed in Fall 2017, whereas the fungal community was more uneven in Summer and Fall  
280 2017 than the other two sampling seasons ( $P < 0.05$ ).

281 Permanova tests showed that short-term application of N fertilizers caused significant  
282 variation in bacterial/archaeal and fungal community composition ( $P < 0.05$ ) (Table 1 and Fig.

283 4). Together, N fertilization effects could explain 3.4% of variation in bacterial/archaeal and  
284 4.4 % of fungal community variation (Table 1). However, the spatio-temporal variation (depth  
285 and season) were more significant than N effects for bacterial, archaeal and fungal communities  
286 ( $P < 0.0001$ ) (Table 1 and Fig. 4). Soil depth and sampling season contributed to approximately  
287 16.8 and 17.3% of bacterial/archaeal community variation, respectively, and 12.4 and 22.4 % of  
288 fungal community change, respectively (Table 1), thus indicating relatively slight short-term  
289 effects of N fertilization on microbial communities when compared to the spatio-temporal  
290 variation. In addition, RELATE analyses further confirmed that bacterial/archaeal community  
291 structures were significantly related to the fungal community (Rho = 0.218,  $P < 0.01$ ),  
292 suggesting that the patterns of spatio-temporal variation were generally similar in both bacterial  
293 and fungal community distributions among tested plots and seasons.

294

#### 295 **Microbial taxonomic composition post-nitrogen addition**

296 Because N level factors had no interaction with soil depth and sampling season (Table 1), N  
297 effects on microbial phylogenetic composition were assessed across both sampling depths and  
298 seasons (Fig. 5). Generally, N fertilization caused significant differences in the recovered genus  
299 level composition for prominent members of the bacterial/archaeal (6%) and the fungal (5%)  
300 communities, respectively (relative abundance  $> 0.01\%$ ) (Fig. 5). Specifically, for  
301 bacterial/archaeal community composition, N input at 200 kg N ha<sup>-1</sup> significantly reduced the  
302 relative abundance of *Salinibacterium* and *Pseudonocardia* (Actinobacteria), *Caldilinear*  
303 (Chloroflexi), and *Desulfobulbus* (Proteobacteria), but increased *Sorangium* (Proteobacteria) ( $P$   
304  $< 0.05$ ), indicating that these taxonomic groups were significantly altered by the synthetic N  
305 fertilizers. In the fungal community profiles, application of N fertilizers at 100 or 200 kg N ha<sup>-1</sup>

306 significantly decreased the proportion of *Archaeorhizomyces* (Ascomycota), as well as  
307 *Crepidotus* and *Uthatabasidium* (Basidiomycota) ( $P < 0.05$ ).

308 Both soil depth and sampling season resulted in more significant alteration to  
309 bacterial/archaeal community composition than N application (Fig. 6). For example, 81%  
310 bacterial taxonomic groups at the genus level (with relative abundance  $> 0.1\%$ ) differed  
311 significantly between 0-5 and 5-15 cm of soil layers ( $P < 0.05$ ), and significant variation  
312 occurred even at the phylum level. Generally, the 0-5 cm soil layer had a greater abundance of  
313 the phyla of Bacteroidetes, Planctomycetes, and Verrucomicrobia, whereas the phyla  
314 Chloroflexi, Nitrospirae, and Proteobacteria dominated the 5-15 cm soil layer ( $P < 0.05$ ) (Fig. 6).  
315 Sampling season also caused significant changes in bacterial community composition with ~80%  
316 of bacterial genera significantly affected ( $P < 0.05$ ) (Fig. 6), mostly in the prominent phyla of  
317 Acidobacteria, Actinobacteria, Bacteroidetes, and Verrucomicrobia, suggesting that these  
318 taxonomic groups were most responsive to temporal changes.

319 In the fungal community, only 54% prominent genera (of relative abundance  $> 0.1\%$ )  
320 showed a significant changes between two soil depths, in which members of the phyla of  
321 Ascomycota, Chytridiomycota, and Glomeromycota were more prevalent in top soil layer of 0-5  
322 cm ( $P < 0.05$ ) (Fig. 7). Approximately 90% of the prominent fungal taxonomic groups classified  
323 at the genus level (relative abundance  $> 0.1\%$ ) significantly varied over sampling seasons ( $P <$   
324  $0.05$ ) (Fig. 7).

325 Venn diagrams were used to better visualize these changes of bacterial/archaeal and fungal  
326 taxonomic groups affected by soil depth and sampling season (Fig. 8). In bacteria, there were  
327 61% of significantly affected genera shared by two factors of soil depth and sampling season,  
328 showing that most bacterial groups that differed between depths also responded to temporal

329 change. In fungi, many more fungal taxonomic groups significantly varied across the four  
330 seasonal samples than depth difference (Fig. 8), indicating that temporal variation affected fungal  
331 community composition more significantly than spatial variation.

332

### 333 **Microbial community associations with switchgrass yields and plant C/N contents**

334 Compared to the control plots, N fertilization at 100 and 200 kg N ha<sup>-1</sup> increased switchgrass  
335 yields by 43% and 171%, respectively (Table 2). In addition, N inputs also significantly  
336 increased plant N, but reduced relative C content and C/N ratios ( $P < 0.05$ ) as measured at the  
337 end of the growing season. The DistLM analysis showed that switchgrass yields were  
338 significantly correlated with the community structure of bacteria/archaea and fungi, but  
339 explained only a small portion of variation, *i.e.*, 2.6%, 1.2%, in bacterial/archaeal and fungal  
340 profiles, respectively ( $P < 0.01$ ) (Table 2), suggesting a small but significant correlation between  
341 above-ground switchgrass growth and below-ground microbiomes through N fertilization.

342

## 343 **Discussion**

### 344 **Short-term N effects on microbial communities**

345 Long-term N input can alter microbial composition and diversity, mainly due to N-induced soil  
346 acidification and fertility decline [10]. Many long-term studies have reported that N fertilization  
347 not only reduces below-ground biodiversity but also shifts bacterial composition at the phylum  
348 level, for groups such as Proteobacteria, Acidobacteria and Actinobacteria [44-48]. Field studies  
349 focusing on short-term effects of N fertilization on microbial communities however are limited  
350 in number for comparison. In our study, one-time fertilization did not affect the richness and  
351 diversity of soil microbial communities, but caused structural changes in both bacterial/archaeal



352 and fungal community composition (Fig. 4). Our work suggests that some phylogenetic groups  
353 of bacteria and fungi might quickly react to N inputs, even when soil properties are not  
354 significantly modified by short-term N fertilization. These N effects were consistent across two  
355 soil depths and four sampling seasons because there was no significant interaction between N  
356 and depth/season (Table 1). We also observed that the one-time N amendment appeared to  
357 directly repress some bacterial and fungal groups based on the negative relationship of relative  
358 abundance with N levels, for example bacterial genus *Pseudonocardia*, and fungal genus  
359 *Archaeorhizomyces* (Fig. 5).

360 *Pseudonocardia* is a common endophytic Actinomycete frequently isolated from host plant  
361 tissues [49], which has been reported to achieve associative nitrogen fixation without the  
362 formation of nodules [50] and protect their hosts against soil-borne pathogenic infection through  
363 producing antibiotics or siderophores [51, 52]. As a free living diazotrophic Actinomycete, it has  
364 also been reported to be prominent in nutrient limited environments [53, 54] or low-input agro-  
365 ecosystems [55, 56], due to its low requirement for N. Based on sequencing of 16S rRNA genes,  
366 it was also found that *Pseudonocardia* OTUs were reduced in the fertilized plant rhizosphere of  
367 Canola (*Brassica napus*) [57]. Our results support that the relative abundances of  
368 *Pseudonocardia* are significantly and negatively associated with N fertilization (Fig. 5),  
369 suggesting that even short-term N inputs might acutely suppress this associative nitrogen fixer in  
370 switchgrass cultivated lands.

371 The *Archaeorhizomyces* are an ancient class of ubiquitous soil fungi [58], which are neither  
372 mycorrhizal nor pathogenic, but may be root endophytic or free-living saprophytes [59]. This  
373 group was first discovered in tundra soils [60] using rRNA-based sequencing, but was only  
374 isolated into culture more recently [58] and very little is definitively known about the physiology

375 and ecology of this group of organisms and this knowledge comes only from only one extant  
376 isolate of the broad class of organisms. By investigating how organic matter accumulation and  
377 forest fertility influences fungal community composition, it was found from ITS rRNA gene  
378 analyses that *Archaeorhizomyces* dominated root-associated Ascomycetes and there abundance  
379 significantly correlated with a fertility gradient in European boreal forests [61]. Moreover, it has  
380 been shown that the relative abundance of *Archaeorhizomyces* in grasslands is greatly stimulated  
381 by amendment of the biofertilizers *Trichoderma* [62] and correlations between soil properties  
382 and fungal abundance suggested that soil P availability (rather than N) may be a controlling  
383 factor for *Archaeorhizomyces* relative abundance. However, in our study, inorganic N  
384 fertilization significantly reduced the relative abundance of *Archaeorhizomyces*, which was one  
385 of the dominant groups of the in Ascomycota present in our study at 3.1-6.9% relative abundance  
386 (Fig. 5). Further studies on the ecology of these diverse fungi are clearly needed through both  
387 additional rRNA gene amplicon studies in natural systems, as well as the isolation of additional  
388 representatives for ecophysiological analyses.

389

### 390 **Spatial heterogeneity in microbial communities**

391 Several studies have reported that soil bacterial and fungal diversity levels can either decrease  
392 [23, 63, 64], remain unchanged [25, 65, 66] or increase [67] with soil depth. We consistently  
393 observed reduced community richness and diversity in 5-15 cm compared to 0-5 cm soil layers  
394 for both bacterial/archaeal and fungal communities (Fig. 3). Since plant residue serves as a key  
395 carbon source for soil microbes, the vertical distribution of microbial communities is likely to  
396 reflect the different available organic matter content with soil depths for microbial decomposers  
397 [64]. For example, the surface soil may have more easily decomposable carbon directly derived

398 from crop residues, with more diverse groups of microbes able to access the labile organic  
399 materials in this niche [68] whereas subsurface soils may harbor relatively more recalcitrant  
400 carbon sources or be more dependent on root inputs. We also observed less soil C and N in 5-15  
401 cm soil layers, further suggesting nutrient levels may be among the factors driving these depth  
402 related patterns in diversity.

403 Compared to the small amount of community variation attributable to N addition, we  
404 observed more significant shifts in both bacterial/archaeal and fungal community composition  
405 between soil depths. Generally, Bacteroidetes, Planctomycetes, and Verrucomicrobia were more  
406 abundant in the 0-5 cm soil layer. This spatial differentiation of the dominant bacterial groups by  
407 soil depth was consistent to many previous studies. For example, it has been shown that bacterial  
408 community composition was significantly altered at different soil depths, which was associated  
409 primarily with a decline of Bacteroidetes with depth [23]. Others have also reported that  
410 Verrucomicrobia exhibit higher relative abundance in the surface soils [25, 67]. In contrast, our  
411 results showed that the 5-15 cm soil layer had greater abundance in the phyla of Chloroflexi,  
412 Nitrospirae, and Proteobacteria. Similarly, it is also demonstrated that as soil depth increased, the  
413 relative abundance of Proteobacteria increased and it became the dominant bacterial group in  
414 subsoil [65]. Though the overall Proteobacteria were more abundant in 5-15 cm soils, the class  
415 Betaproteobacteria was most abundant in 0-5 cm, which was also found in other study [69].  
416 Similar to our results, others have also reported that Chloroflexi [66, 67] and Nitrospirae [70]  
417 increase in abundance with soil depth.

418 In this study, we observed that fungal community also showed strong vertical distribution  
419 patterns in the major groups, such as Ascomycota, Chytridiomycota, and Glomeromycota, which  
420 were more abundant in top 0-5 cm soil layer; however, compared to bacterial community, there

421 were overall fewer fungal taxonomic groups that differed between soil depths (Fig. 6 and 7).  
422 Several studies have highlighted the ecological significance of vertically distinct fungal  
423 communities. For example, using pyrosequencing of ITS amplicon, others have found a decrease  
424 in relative abundance of Ascomycota with increasing soil depth, whereas Zygomycota showed  
425 the opposite trend [63]. At finer taxonomic scales, it was reported that Sordariomycetes of the  
426 phylum Ascomycota decrease with soil depth [70], and this pattern was similar in our study.  
427 Others have also shown overall fungal communities pattern were highly variable with soil depth,  
428 where deeper soil have some distinct fungal groups, but significantly less overall diversity [64]  
429 similar to what we observe here.

430

#### 431 **Temporal variation in microbial communities**

432 We found significant temporal changes in alpha diversity in both bacterial and fungal  
433 communities (Fig. 3). Similarly, it has been shown that bacterial community alpha diversity  
434 varied more substantially than beta diversity over time, and in this case exceeded the variability  
435 between land-use types [24]. Thus, it was suggested that temporal differences in rhizodeposition  
436 may be a controlling factor to affect soil bacterial diversity. Our data show that seasonal  
437 variation is found in most dominant phylogenetic groups of bacteria, such as Acidobacteria,  
438 Actinobacteria, Bacteroidetes, Chloroflexi, and Verrucomicrobia (Fig. 6). Interestingly  
439 Acidobacteria, Bacteroidetes, Betaproteobacteria, Deltaproteobacteria, Gammaproteobacteria,  
440 and Verrucomicrobia all had similar seasonal patterns, which were opposite to those of  
441 Actinobacteria, Chloroflexi, and Alphaproteobacteria. That dominant bacterial phyla, such as  
442 Actinobacteria and Betaproteobacteria, shift with seasonally to temporal patterns has been  
443 reported previously [65]. In addition, it has been shown that seasonal dynamics often appear to

444 be coherent within taxonomic lineages, in which Acidobacteria and Proteobacteria are more  
445 prevalent in summer, whereas Actinobacteria and Chloroflexi increase in winter [71].

446 In our experiment, the fungal phyla Chytridiomycota, Glomeromycota, and Zygomycota,  
447 were also found to vary significantly over the different seasonal sampling times (Fig. 7).  
448 Similarly, it was reported that the number of fungal species belonging to Ascomycota and  
449 Glomeromycota increase in summer, whereas Basidiomycota were dominant in winter [72] or  
450 that Ascomycota, Basidiomycota, and Zygomycota are variable from spring to winter [73]. It has  
451 been suggested that changes in litter decomposition and phytosynthate allocation contribute to  
452 the seasonal variations of fungal community [74] as well as the direct effects of soil moisture and  
453 temperature [24]. However, contrary to this we did not observe distinct seasonal changes in the  
454 overall dominance patterns of Ascomycota or Basidiomycota in our study.

455

## 456 **Conclusions**

457 With the aid of high-throughput 16S rRNA gene and ITS region amplicon sequencing, we found  
458 highly diverse and dynamic communities across this 8 year-old switchgrass field. The one-time  
459 application of N fertilization significantly stimulated switchgrass growth and N uptake, and  
460 subtly but significantly shifted below-ground bacterial and fungal communities, with the  
461 bacterial genus *Pseudonocardia* and *Archaeorhizomyces* fungi negatively responsive to N inputs.  
462 However, these shifts took place within the context of much larger spatial and temporal variation  
463 in the microbial community. These large spatial and seasonal fluctuations in microbial  
464 communities reinforce the importance of robust sampling designs and should caution against  
465 overinterpretation of studies based on one-time sampling events. Further studies should aim at

466 studying the ecological and physiological mechanisms of responses to N fertilization by these  
467 microbes and how these may influence ecosystem functions.

468

#### 469 **Data Availability Statement**

470 The 16S rRNA gene and ITS region amplicon sequences were deposited on NCBI Sequence  
471 Read Archive (SRA) database under the BioProject accession number of PRJNA512218. Soil  
472 metagenome sequences were uploaded to Rapid Annotation using Subsystems Technology for  
473 Metagenomes (MG-RAST; <http://metagenomics.anl.gov>) under project accession number  
474 mgp22000.

475

#### 476 **Funding**

477 This study was supported by the Laboratory Directed Research and Development Program of  
478 Oak Ridge National Laboratory. Oak Ridge National Laboratory is managed by UT-Battelle,  
479 LLC for the U. S. Department of Energy under Contract No. DE-AC05-00OR22725.

480

#### 481 **Competing Interest**

482 Co-author Dafeng Hui is an Academic Editor for PLoSOne. This does not alter the authors'  
483 adherence to all the PLoSOne policies on sharing data and materials.

484

#### 485 **Author Contributions**

486 Conceived and designed the experiments: HC CWS. Performed the experiments: HC ZKY DY  
487 RHM SJL DMK DH CWS. Analyzed the data: HC CWS. Contributed to the writing of the  
488 manuscript: HC MAC RLH GW FEL CWS.

489

490 **References**

- 491 1. Demirbas A. Political, economic and environmental impacts of biofuels: A review. *Applied*  
492 *Energy*. 2009;86, Supplement 1(0):S108-S17.
- 493 2. Jagger A. Biofuels for transport in 2050. *Biofuels, Bioproducts and Biorefining*.  
494 2011;5(5):481-5.
- 495 3. Wang Z, Smyth TJ, Crozier CR, Gehl RJ, Heitman AJ. Yield and Nitrogen Removal of  
496 Bioenergy Grasses as Influenced by Nitrogen Rate and Harvest Management in the Coastal  
497 Plain Region of North Carolina. *BioEnergy Research*. 2018;11(1):44-53.
- 498 4. Fike JH, Pease JW, Owens VN, Farris RL, Hansen JL, Heaton EA, et al. Switchgrass  
499 nitrogen response and estimated production costs on diverse sites. *Gcb Bioenergy*.  
500 2017;9(10):1526-42.
- 501 5. Gopalakrishnan G, Cristina Negri M, Snyder SW. A novel framework to classify marginal  
502 land for sustainable biomass feedstock production. *Journal of environmental quality*.  
503 2011;40(5):1593-600.
- 504 6. Toma YO, Fernández FG, Sato S, Izumi M, Hatano R, Yamada T, et al. Carbon budget and  
505 methane and nitrous oxide emissions over the growing season in a *Miscanthus sinensis*  
506 grassland in Tomakomai, Hokkaido, Japan. *GCB Bioenergy*. 2011;3(2):116-34.
- 507 7. Nazir R, Warmink JA, Boersma H, Van Elsas JD. Mechanisms that promote bacterial fitness  
508 in fungal-affected soil microhabitats. *FEMS Microbiology Ecology*. 2010;71(2):169-85.
- 509 8. Nielsen U, Ayres E, Wall D, Bardgett R. Soil biodiversity and carbon cycling: a review and  
510 synthesis of studies examining diversity–function relationships. *European Journal of Soil*  
511 *Science*. 2011;62(1):105-16.

- 512 9. Van Der Heijden MG, Bardgett RD, Van Straalen NM. The unseen majority: soil microbes  
513 as drivers of plant diversity and productivity in terrestrial ecosystems. *Ecology letters*.  
514 2008;11(3):296-310.
- 515 10. Dai Z, Su W, Chen H, Barberán A, Zhao H, Yu M, et al. Long-term nitrogen fertilization  
516 decreases bacterial diversity and favors the growth of Actinobacteria and Proteobacteria in  
517 agro-ecosystems across the globe. *Global change biology*. 2018.
- 518 11. Ramirez KS, Craine JM, Fierer N. Consistent effects of nitrogen amendments on soil  
519 microbial communities and processes across biomes. *Global Change Biology*.  
520 2012;18(6):1918-27.
- 521 12. Leff JW, Jones SE, Prober SM, Barberán A, Borer ET, Firm JL, et al. Consistent responses  
522 of soil microbial communities to elevated nutrient inputs in grasslands across the globe.  
523 *Proceedings of the National Academy of Sciences*. 2015;112(35):10967-72.
- 524 13. Rousk J, Bååth E, Brookes PC, Lauber CL, Lozupone C, Caporaso JG, et al. Soil bacterial  
525 and fungal communities across a pH gradient in an arable soil. *The ISME journal*.  
526 2010;4(10):1340.
- 527 14. Bardgett RD, Lovell RD, Hobbs PJ, Jarvis SC. Seasonal changes in soil microbial  
528 communities along a fertility gradient of temperate grasslands. *Soil Biology and*  
529 *Biochemistry*. 1999;31(7):1021-30.
- 530 15. Tlustos P, Willison T, Baker J, Murphy D, Pavlikova D, Goulding K, et al. Short-term  
531 effects of nitrogen on methane oxidation in soils. *Biology and Fertility of Soils*.  
532 1998;28(1):64-70.



- 533 16. Wang Q, Wang S, Liu Y. Responses to N and P fertilization in a young *Eucalyptus dunnii*  
534 plantation: microbial properties, enzyme activities and dissolved organic matter. *Applied*  
535 *Soil Ecology*. 2008;40(3):484-90.
- 536 17. Wang C, Long R, Wang Q, Liu W, Jing Z, Zhang L. Fertilization and litter effects on the  
537 functional group biomass, species diversity of plants, microbial biomass, and enzyme  
538 activity of two alpine meadow communities. *Plant and Soil*. 2010;331(1-2):377-89.
- 539 18. Jang I, Lee S, Zoh K-D, Kang H. Methane concentrations and methanotrophic community  
540 structure influence the response of soil methane oxidation to nitrogen content in a temperate  
541 forest. *Soil Biology and Biochemistry*. 2011;43(3):620-7.
- 542 19. Deslippe JR, Egger KN, Henry GH. Impacts of warming and fertilization on nitrogen-fixing  
543 microbial communities in the Canadian High Arctic. *FEMS microbiology ecology*.  
544 2005;53(1):41-50.
- 545 20. Piceno Y, Lovell C. Stability in natural bacterial communities: I. Nutrient addition effects on  
546 rhizosphere diazotroph assemblage composition. *Microbial ecology*. 2000;39(1):32-40.
- 547 21. Karp A, Shield I. Bioenergy from plants and the sustainable yield challenge. *New*  
548 *Phytologist*. 2008;179(1):15-32.
- 549 22. McLaughlin SB, Kszos LA. Development of switchgrass (*Panicum virgatum*) as a bioenergy  
550 feedstock in the United States. *Biomass and Bioenergy*. 2005;28(6):515-35.
- 551 23. Eilers KG, Debenport S, Anderson S, Fierer N. Digging deeper to find unique microbial  
552 communities: the strong effect of depth on the structure of bacterial and archaeal  
553 communities in soil. *Soil Biology and Biochemistry*. 2012;50:58-65.
- 554 24. Lauber CL, Ramirez KS, Aanderud Z, Lennon J, Fierer N. Temporal variability in soil  
555 microbial communities across land-use types. *The ISME journal*. 2013;7(8):1641.

- 556 25. Bai R, Wang J-T, Deng Y, He J-Z, Feng K, Zhang L-M. Microbial community and  
557 functional structure significantly varied among distinct types of paddy soils but responded  
558 differently along gradients of soil depth layers. *Frontiers in microbiology*. 2017;8:945.
- 559 26. Dong H-Y, Kong C-H, Wang P, Huang Q-L. Temporal variation of soil friedelin and  
560 microbial community under different land uses in a long-term agroecosystem. *Soil Biology  
561 and Biochemistry*. 2014;69:275-81.
- 562 27. Will C, Thürmer A, Wollherr A, Nacke H, Herold N, Schrumpf M, et al. Horizon-specific  
563 bacterial community composition of German grassland soils, as revealed by  
564 pyrosequencing-based analysis of 16S rRNA genes. *Applied and environmental  
565 microbiology*. 2010;76(20):6751-9.
- 566 28. Lewandowski TE, Forrester JA, Mladenoff DJ, Stoffel JL, Gower ST, D'Amato AW, et al.  
567 Soil microbial community response and recovery following group selection harvest:  
568 Temporal patterns from an experimental harvest in a US northern hardwood forest. *Forest  
569 Ecology and Management*. 2015;340:82-94.
- 570 29. Kramer S, Marhan S, Haslwimmer H, Ruess L, Kandeler E. Temporal variation in surface  
571 and subsoil abundance and function of the soil microbial community in an arable soil. *Soil  
572 Biology and Biochemistry*. 2013;61:76-85.
- 573 30. Cregger MA, Schadt CW, McDowell NG, Pockman WT, Classen AT. Response of the soil  
574 microbial community to changes in precipitation in a semiarid ecosystem. *Applied and  
575 environmental Microbiology*. 2012;78(24):8587-94.
- 576 31. Stevenson BA, Hunter DW, Rhodes PL. Temporal and seasonal change in microbial  
577 community structure of an undisturbed, disturbed, and carbon-amended pasture soil. *Soil  
578 Biology and Biochemistry*. 2014;75:175-85.

- 579 32. DeBruyn JM, Bevard DA, Essington ME, McKnight JY, Schaeffer SM, Baxter HL, et al.  
580 Field-grown transgenic switchgrass (*Panicum virgatum* L.) with altered lignin does not  
581 affect soil chemistry, microbiology, and carbon storage potential. *Gcb Bioenergy*.  
582 2017;9(6):1100-9.
- 583 33. Kennedy RK. The sickledrat: a circular quadrat modification useful in grassland studies.  
584 *Rangeland Ecology & Management/Journal of Range Management Archives*.  
585 1972;25(4):312-3.
- 586 34. Lundberg DS, Yourstone S, Mieczkowski P, Jones CD, Dangl JL. Practical innovations for  
587 high-throughput amplicon sequencing. *Nature methods*. 2013;10(10):999.
- 588 35. Cregger M, Veach A, Yang Z, Crouch M, Vilgalys R, Tuskan G, et al. The *Populus*  
589 holobiont: dissecting the effects of plant niches and genotype on the microbiome.  
590 *Microbiome*. 2018;6(1):31.
- 591 36. Martin M. Cutadapt removes adapter sequences from high-throughput sequencing reads.  
592 *EMBnet journal*. 2011;17(1):pp. 10-2.
- 593 37. Caporaso JG, Kuczynski J, Stombaugh J, Bittinger K, Bushman FD, Costello EK, et al.  
594 QIIME allows analysis of high-throughput community sequencing data. *Nature Methods*.  
595 2010;7(5):335-6.
- 596 38. Wang Q, Garrity GM, Tiedje JM, Cole JR. Naive Bayesian classifier for rapid assignment of  
597 rRNA sequences into the new bacterial taxonomy. *Applied and environmental*  
598 *microbiology*. 2007;73(16):5261-7.
- 599 39. Langille MG, Zaneveld J, Caporaso JG, McDonald D, Knights D, Reyes JA, et al. Predictive  
600 functional profiling of microbial communities using 16S rRNA marker gene sequences.  
601 *Nature biotechnology*. 2013;31(9):814-21.

- 602 40. Meyer F, Paarmann D, D'Souza M, Olson R, Glass EM, Kubal M, et al. The metagenomics  
603 RAST server—a public resource for the automatic phylogenetic and functional analysis of  
604 metagenomes. *BMC bioinformatics*. 2008;9(1):386.
- 605 41. Anderson M. DISTLM v. 5: a FORTRAN computer program to calculate a distance-based  
606 multivariate analysis for a linear model. Department of Statistics, University of Auckland,  
607 New Zealand. 2004;10:2016.
- 608 42. Babicki S, Arndt D, Marcu A, Liang Y, Grant JR, Maciejewski A, et al. Heatmapper: web-  
609 enabled heat mapping for all. *Nucleic acids research*. 2016;44(W1):W147-W53.
- 610 43. Oliveros J. An interactive tool for comparing lists with Venn's diagrams (2007–2015).
- 611 44. Zhou J, Guan D, Zhou B, Zhao B, Ma M, Qin J, et al. Influence of 34-years of fertilization  
612 on bacterial communities in an intensively cultivated black soil in northeast China. *Soil  
613 Biology and Biochemistry*. 2015;90:42-51.
- 614 45. Xun W, Zhao J, Xue C, Zhang G, Ran W, Wang B, et al. Significant alteration of soil  
615 bacterial communities and organic carbon decomposition by different long-term fertilization  
616 management conditions of extremely low-productivity arable soil in South China.  
617 *Environmental microbiology*. 2016;18(6):1907-17.
- 618 46. Ling N, Chen D, Guo H, Wei J, Bai Y, Shen Q, et al. Differential responses of soil bacterial  
619 communities to long-term N and P inputs in a semi-arid steppe. *Geoderma*. 2017;292:25-33.
- 620 47. Coolon JD, Jones KL, Todd TC, Blair JM, Herman MA. Long-term nitrogen amendment  
621 alters the diversity and assemblage of soil bacterial communities in tallgrass prairie. *PLoS  
622 One*. 2013;8(6):e67884.

- 623 48. Pan Y, Cassman N, de Hollander M, Mendes LW, Korevaar H, Geerts RH, et al. Impact of  
624 long-term N, P, K, and NPK fertilization on the composition and potential functions of the  
625 bacterial community in grassland soil. *FEMS microbiology ecology*. 2014;90(1):195-205.
- 626 49. Hamed J, Mohammadipanah F. Biotechnological application and taxonomical distribution  
627 of plant growth promoting actinobacteria. *Journal of industrial microbiology &*  
628 *biotechnology*. 2015;42(2):157-71.
- 629 50. Valdés M, Pérez N-O, Estrada-de Los Santos P, Caballero-Mellado J, Pena-Cabriaes JJ,  
630 Normand P, et al. Non-Frankia actinomycetes isolated from surface-sterilized roots of  
631 *Casuarina equisetifolia* fix nitrogen. *Applied and environmental microbiology*.  
632 2005;71(1):460-6.
- 633 51. Janso JE, Carter GT. Biosynthetic potential of phylogenetically unique endophytic  
634 actinomycetes from tropical plants. *Applied and environmental microbiology*.  
635 2010;76(13):4377-86.
- 636 52. Wang R, Zhang H, Sun L, Qi G, Chen S, Zhao X. Microbial community composition is  
637 related to soil biological and chemical properties and bacterial wilt outbreak. *Scientific*  
638 *Reports*. 2017;7(1):343.
- 639 53. Zhang Y-Q, Liu H-Y, Chen J, Yuan L-J, Sun W, Zhang L-X, et al. Diversity of culturable  
640 actinobacteria from Qinghai–Tibet plateau, China. *Antonie Van Leeuwenhoek*.  
641 2010;98(2):213-23.
- 642 54. De Mandal S, Chatterjee R, Kumar NS. Dominant bacterial phyla in caves and their  
643 predicted functional roles in C and N cycle. *BMC microbiology*. 2017;17(1):90.

- 644 55. Yin C, Mueth N, Hulbert S, Schlatter D, Paulitz TC, Schroeder K, et al. Bacterial  
645 communities on wheat grown under long-term conventional tillage and no-till in the Pacific  
646 Northwest of the United States. *Phytobiomes*. 2017;1(2):83-90.
- 647 56. Dorr de Quadros P, Zhalnina K, Davis-Richardson A, Fagen JR, Drew J, Bayer C, et al. The  
648 effect of tillage system and crop rotation on soil microbial diversity and composition in a  
649 subtropical Acrisol. *Diversity*. 2012;4(4):375-95.
- 650 57. Monreal C, Zhang J, Koziel S, Vidmar J, González M, Matus F, et al. Bacterial community  
651 structure associated with the addition of nitrogen and the dynamics of soluble carbon in the  
652 rhizosphere of canola (*Brassica napus*) grown in a Podzol. *Rhizosphere*. 2018;5:16-25.
- 653 58. Rosling A, Cox F, Cruz-Martinez K, Ihrmark K, Grelet G-A, Lindahl BD, et al.  
654 Archaeorhizomycetes: unearthing an ancient class of ubiquitous soil fungi. *Science*.  
655 2011;333(6044):876-9.
- 656 59. Rosling A, Timling I, Taylor DL. Archaeorhizomycetes: Patterns of distribution and  
657 abundance in soil. *Genomics of Soil-and Plant-Associated Fungi*: Springer; 2013. p. 333-  
658 49.
- 659 60. Schadt CW, Martin AP, Lipson DA, Schmidt SK. Seasonal dynamics of previously  
660 unknown fungal lineages in tundra soils. *Science*. 2003;301(5638):1359-61.
- 661 61. Kvaschenko J, Clemmensen KE, Karlton E, Lindahl BD. Below-ground organic matter  
662 accumulation along a boreal forest fertility gradient relates to guild interaction within fungal  
663 communities. *Ecology Letters*. 2017;20(12):1546-55.
- 664 62. Zhang F, Huo Y, Cobb AB, Luo G, Zhou J, Yang G, et al. Trichoderma biofertilizer links to  
665 altered soil chemistry, altered microbial communities, and improved grassland biomass.  
666 *Frontiers in microbiology*. 2018;9.

- 667 63. Santalahti M, Sun H, Jumpponen A, Pennanen T, Heinonsalo J. Vertical and seasonal  
668 dynamics of fungal communities in boreal Scots pine forest soil. *FEMS microbiology*  
669 *ecology*. 2016;92(11):fiw170.
- 670 64. Schlatter DC, Kahl K, Carlson B, Huggins DR, Paulitz T. Fungal community composition  
671 and diversity vary with soil depth and landscape position in a no-till wheat-based cropping  
672 system. *FEMS microbiology ecology*. 2018.
- 673 65. Bevivino A, Paganin P, Bacci G, Florio A, Pellicer MS, Papaleo MC, et al. Soil bacterial  
674 community response to differences in agricultural management along with seasonal changes  
675 in a Mediterranean region. *PLoS One*. 2014;9(8):e105515.
- 676 66. Steven B, Gallegos-Graves LV, Belnap J, Kuske CR. Dryland soil microbial communities  
677 display spatial biogeographic patterns associated with soil depth and soil parent material.  
678 *FEMS microbiology ecology*. 2013;86(1):101-13.
- 679 67. Mueller RC, Belnap J, Kuske CR. Soil bacterial and fungal community responses to  
680 nitrogen addition across soil depth and microhabitat in an arid shrubland. *Frontiers in*  
681 *microbiology*. 2015;6:891.
- 682 68. Boer Wd, Folman LB, Summerbell RC, Boddy L. Living in a fungal world: impact of fungi  
683 on soil bacterial niche development. *FEMS microbiology reviews*. 2005;29(4):795-811.
- 684 69. Lüdemann H, Arth I, Liesack W. Spatial changes in the bacterial community structure along  
685 a vertical oxygen gradient in flooded paddy soil cores. *Applied and Environmental*  
686 *Microbiology*. 2000;66(2):754-62.
- 687 70. Ko D, Yoo G, Yun S-T, Jun S-C, Chung H. Bacterial and fungal community composition  
688 across the soil depth profiles in a fallow field. *Journal of Ecology and Environment*.  
689 2017;41(1):34.

- 690 71. Kuffner M, Hai B, Rattei T, Melodelima C, Schloter M, Zechmeister-Boltenstern S, et al.  
691 Effects of season and experimental warming on the bacterial community in a temperate  
692 mountain forest soil assessed by 16S rRNA gene pyrosequencing. *FEMS microbiology*  
693 *ecology*. 2012;82(3):551-62.
- 694 72. Aoki Y, Fujita K, Shima H, Suzuki S. Survey of annual and seasonal fungal communities in  
695 Japanese *Prunus mume* orchard soil by next-generation sequencing. *Advances in*  
696 *Microbiology*. 2015;5(13):817.
- 697 73. Kim CS, Nam JW, Jo JW, Kim S-Y, Han J-G, Hyun MW, et al. Studies on seasonal  
698 dynamics of soil-higher fungal communities in Mongolian oak-dominant Gwangneung  
699 forest in Korea. *Journal of Microbiology*. 2016;54(1):14-22.
- 700 74. Voříšková J, Brabcová V, Cajthaml T, Baldrian P. Seasonal dynamics of fungal  
701 communities in a temperate oak forest soil. *New Phytologist*. 2014;201(1):269-78.  
702  
703



704 **Table 1.** Three-factor Permanova results for differences in bacterial/archaeal and fungal  
 705 community structure affected by three N fertilization levels (0, 100, and 200 kg N ha<sup>-1</sup>), two soil  
 706 depths (0-5 and 5-15 cm), and three sampling seasons following N inputs (Spring, Summer, and  
 707 Fall 2017).

| Source           | df  | SS      | MS    | PS-F  | P(perm) | UP   | Estimate | Sq.root |
|------------------|-----|---------|-------|-------|---------|------|----------|---------|
| Bacteria/archaea |     |         |       |       |         |      |          |         |
| N                | 2   | 4010    | 2005  | 1.44  | 0.0384  | 9873 | 12.9     | 3.6     |
| Depth            | 1   | 21742   | 21742 | 15.68 | 0.0001  | 9886 | 282.7    | 16.8    |
| Season           | 2   | 31772   | 15886 | 11.46 | 0.0001  | 9884 | 302.1    | 17.3    |
| N×Depth          | 2   | 1825    | 913   | 0.66  | 0.9879  | 9869 | -19.7    | -4.4    |
| N×Season         | 4   | 5071    | 1268  | 0.91  | 0.6992  | 9809 | -7.4     | -2.7    |
| Depth×Season     | 2   | 9614    | 4807  | 3.47  | 0.0001  | 9793 | 142.5    | 11.9    |
| N×Depth×Season   | 4   | 3729    | 932   | 0.67  | 0.9995  | 9805 | -56.8    | -7.5    |
| Res              | 126 | 1.8E+05 | 1386  |       |         |      |          |         |
| Total            | 143 | 2.5E+05 |       |       |         |      |          |         |
| Fungi            |     |         |       |       |         |      |          |         |
| N                | 2   | 8995    | 4497  | 1.29  | 0.0319  | 9808 | 21.5     | 4.6     |
| Depth            | 1   | 14453   | 14453 | 4.17  | 0.0001  | 9859 | 152.6    | 12.4    |
| Season           | 2   | 54894   | 27447 | 7.92  | 0.0001  | 9808 | 499.6    | 22.4    |
| N×Depth          | 2   | 3897    | 1949  | 0.56  | 1.0000  | 9803 | -63.2    | -8.0    |
| N×Season         | 4   | 14744   | 3686  | 1.06  | 0.3351  | 9720 | 13.8     | 3.7     |
| Depth×Season     | 2   | 19295   | 9647  | 2.78  | 0.0001  | 9793 | 257.6    | 16.1    |
| N×Depth×Season   | 4   | 9534    | 2383  | 0.69  | 1.0000  | 9704 | -135.2   | -11.6   |
| Res              | 126 | 4.4E+05 | 3465  |       |         |      |          |         |
| Total            | 143 | 5.6E+05 |       |       |         |      |          |         |

708 df, degrees of freedom; SS, sum of squares; MS, mean squares; PS-F, pseudo-F value; P(perm),  
 709 permutation P-value based on 9999 permutations; UP, unique values of test statistic obtained  
 710 under permutation; Estimate, estimated component of variation; Sq.root, square root of the  
 711 estimated component of variation.

712

713 **Table 2.** Above-ground biomass yields and plant C/N contents of switchgrass affected by N  
714 fertilization levels as well as their association with community structure of bacteria/archaea and  
715 fungi by marginal test of DistLM. Different letters within each column indicate significant  
716 effects by N fertilization levels at  $\alpha=0.05$ . The \*, \*\*, and \*\*\* indicate significant DistLM  
717 relationship at  $\alpha=0.05$ , 0.01, and 0.001, respectively.

|                                   | Yield (Mg Ha <sup>-1</sup> ) | C (%)   | N (%)  | C/N      |
|-----------------------------------|------------------------------|---------|--------|----------|
| N level (kg N ha <sup>-1</sup> )  |                              |         |        |          |
| 0                                 | 29.6 b                       | 50.43 a | 0.28 a | 189.46 a |
| 100                               | 42.4 ab                      | 49.70 b | 0.83 b | 74.73 b  |
| 200                               | 80.1 a                       | 49.47 b | 0.98 b | 60.62 b  |
| Proportion of explained variation |                              |         |        |          |
| Bacteria/archaea                  | 2.6%***                      | 1.2%*   | 1.0%   | 0.6%     |
| Fungi                             | 1.2%**                       | 1.0%    | 1.0%   | 0.8%     |

718

719

720 **Figure captions**

721 **Fig. 1.** A Google map showing twenty four plots ( $5\text{ m} \times 5\text{ m}$ ) of three N fertilization levels (0,  
722 100, and  $200\text{ kg N ha}^{-1}$ ) with eight replicates based on a complete randomized design.

723 **Fig. 2.** Relative abundances of bacterial/archaeal and fungal dominant phyla (average  
724 abundances  $> 1\%$ ) affected by two soil depths (0-5 and 5-15 cm). Asterisks indicate significant  
725 difference at  $\alpha = 0.05$  between two soil depths.

726 **Fig. 3.** Box plots showing Chao1 richness and Shannon diversity of bacterial/archaeal and fungal  
727 communities affected by two soil depths (0-5 and 5-15 cm) and four sampling seasons (Winter  
728 2016, Spring, Summer, and Fall 2017). Sequence depths were 10000 for 16S and 5000 for ITS.  
729 Asterisks indicate significant difference at  $\alpha = 0.05$  between two soil depths or among four  
730 sampling seasons.

731 **Fig. 4.** Non-metric multidimensional scaling (NMDS) analysis of bacterial/archaeal and fungal  
732 communities affected by three N fertilization levels (0, 100, and  $200\text{ kg N ha}^{-1}$ ), two soil depth  
733 (0-5 and 5-15 cm), and four sampling seasons (Winter 2016, Spring, Summer, and Fall 2017).  
734 Permanova  $P$  values were also given.

735 **Fig. 5.** A heat map of relative abundance of bacterial/archaeal and fungal dominant taxonomic  
736 groups at genus level (average abundances  $> 0.1\%$ ) that were significantly affected by three N  
737 fertilization levels (0, 100, and  $200\text{ kg N ha}^{-1}$ ). Asterisks indicate significant Spearman  
738 correlations of taxonomic abundance with N fertilization levels at  $\alpha = 0.05$ .

739 **Fig. 6.** A heat map of relative abundance of bacterial/archaeal dominant taxonomic groups at  
740 genus level (average abundances  $> 0.1\%$ ) that were significantly variable between two soil  
741 depths (0-5 and 5-15 cm) and over four sampling seasons (Winter 2016, Spring, Summer, and  
742 Fall 2017). Asterisks indicate significant difference between two soil depths (0-5 and 5-15 cm) at

743  $\alpha = 0.05$ . Number signs indicate significant difference over four sampling seasons (Winter 2016,  
744 Spring, Summer, and Fall 2017) at  $\alpha = 0.05$ .

745 **Fig. 7.** A heat map of relative abundance of fungal dominant taxonomic groups at genus level  
746 (average abundances  $> 0.1\%$ ) that were significantly variable between two soil depths (0-5 and  
747 5-15 cm) and over four sampling seasons (Winter 2016, Spring, Summer, and Fall 2017).

748 Asterisks indicate significant difference between two soil depths (0-5 and 5-15 cm) at  $\alpha = 0.05$ .

749 Number signs indicate significant difference over four sampling seasons (Winter 2016, Spring,  
750 Summer, and Fall 2017) at  $\alpha = 0.05$ .

751 **Fig. 8.** Venn's diagrams showing significantly affected bacterial/archaeal and fungal dominant  
752 taxonomic groups at genus level (average abundances  $> 0.1\%$ ) shared between the factors of soil  
753 depth and sampling season.

754 **Supporting Information**

755 **Fig. S1.** Relative abundances of soil metagenomes annotated in RefSeq database (RefSeq), and  
756 functional classification annotated in SEED Subsystems database (SEED Subsystems) in  
757 composite soils sampled at two soil depths (0-5 and 5-15 cm) in Winter 2016. Asterisks indicate  
758 significant difference at  $\alpha = 0.05$  between two soil depths.

759 **Fig. S2.** Non-metric multidimensional scaling (NMDS) analysis of 24 putative functions at  
760 KEGG level 1 predicted by PICRUSt based on 16S rRNA amplicons compared with 4 soil  
761 metagenomes annotated in KO database (KEGG level 1) using soils sampled in Winter 2016.  
762 Permanova  $P$  values were also given.

763

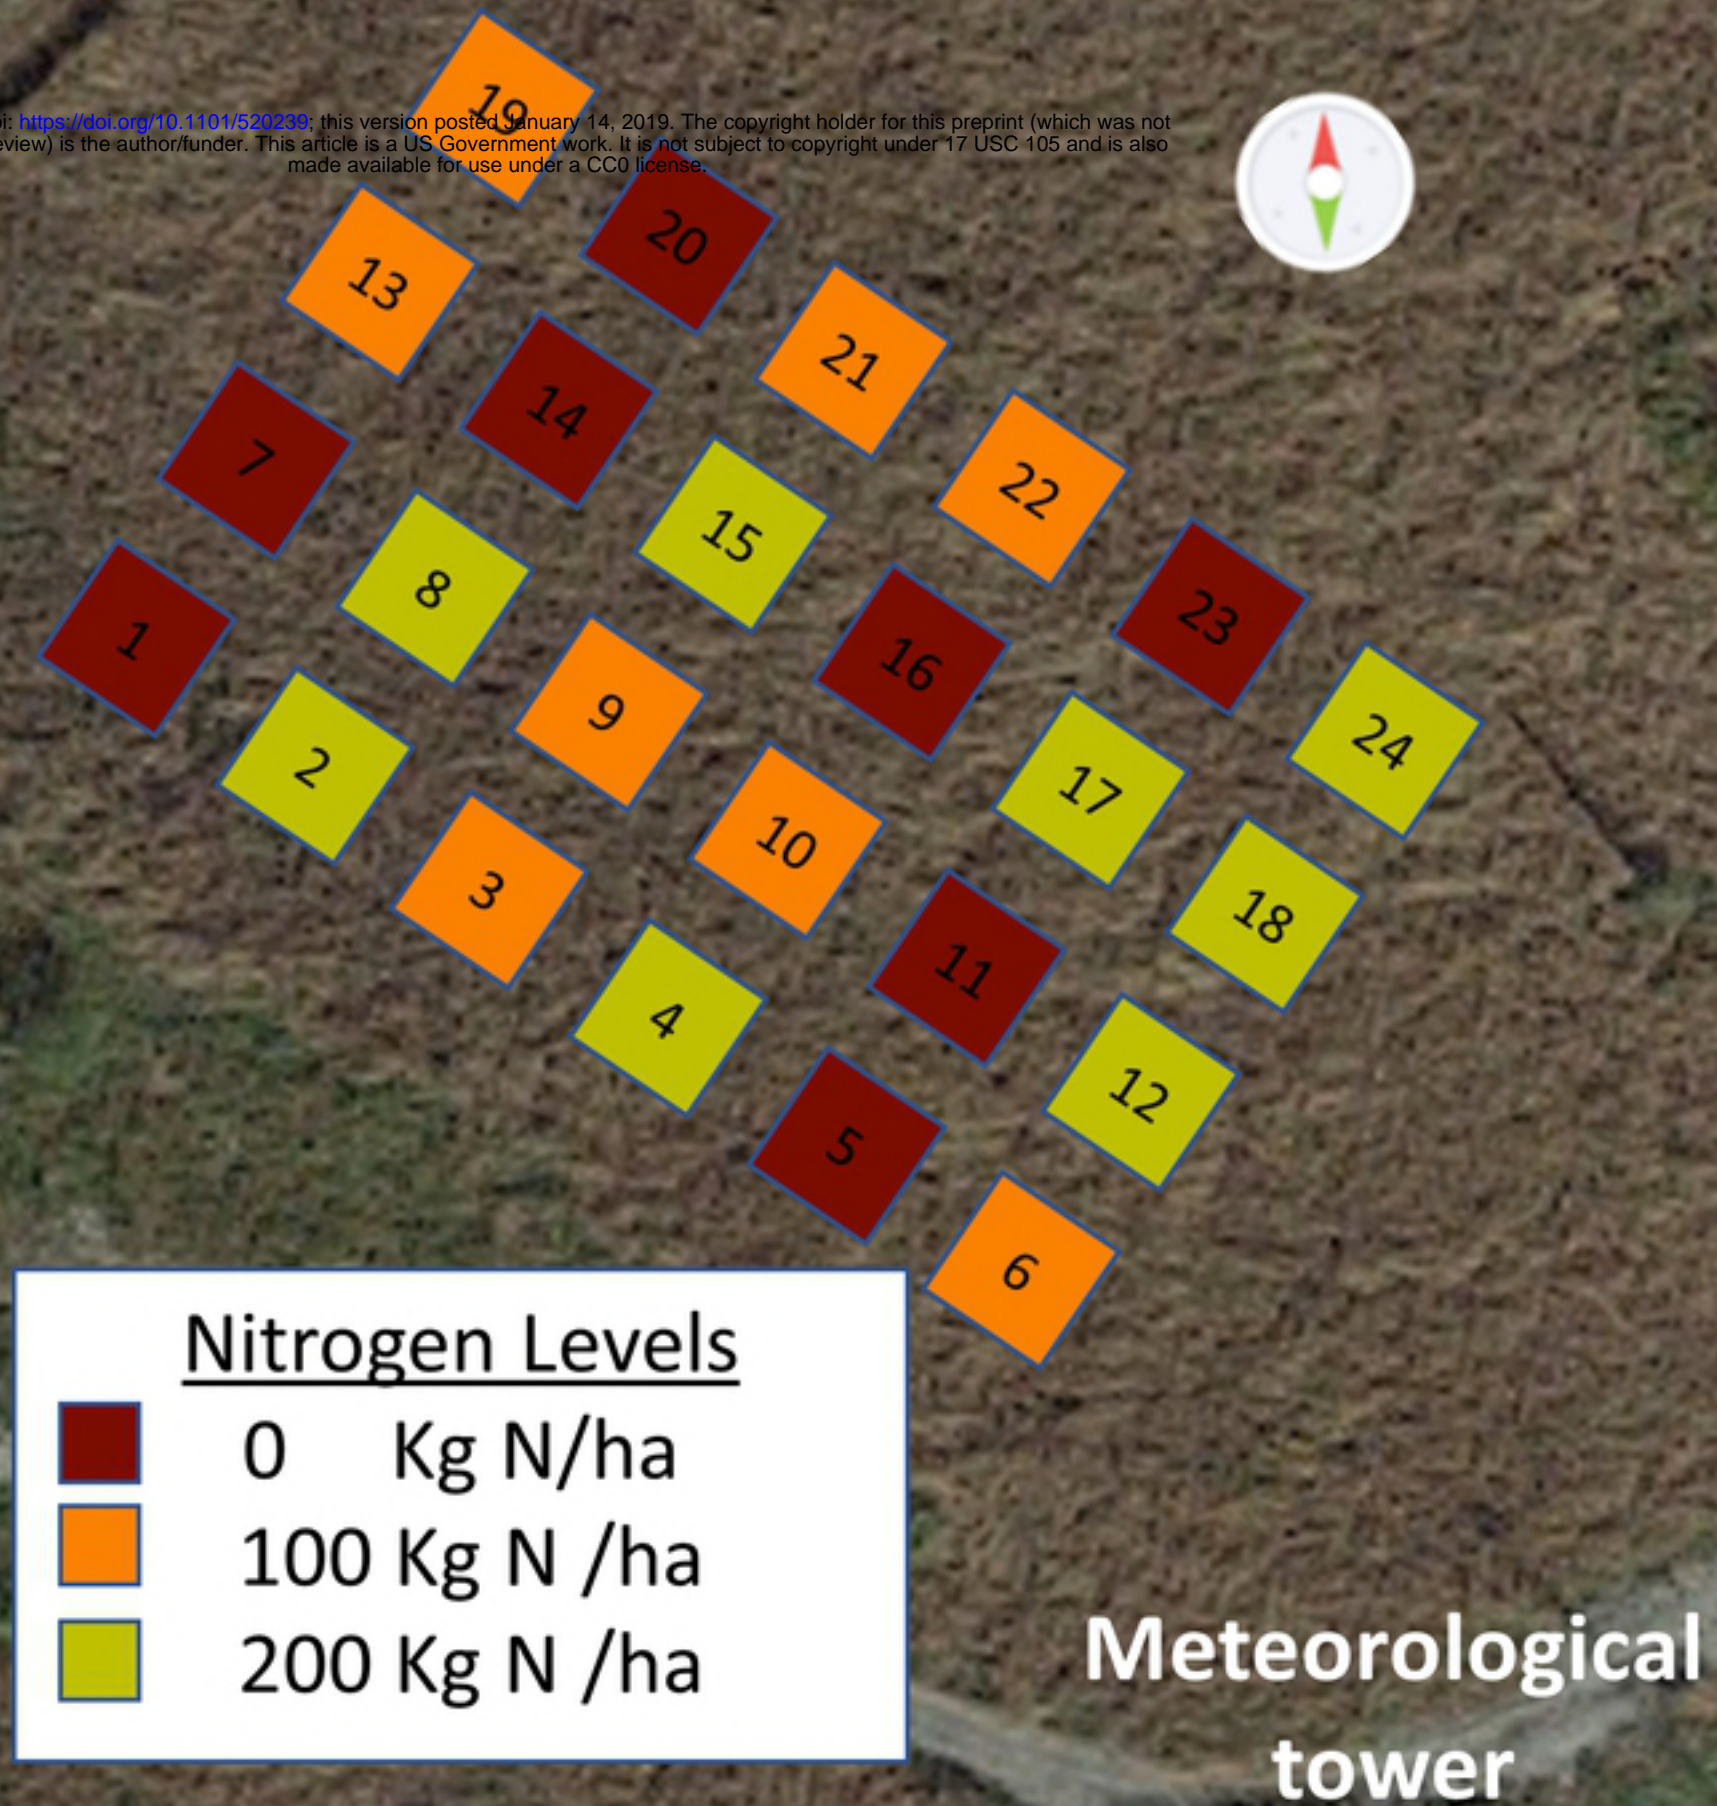

Figure 1

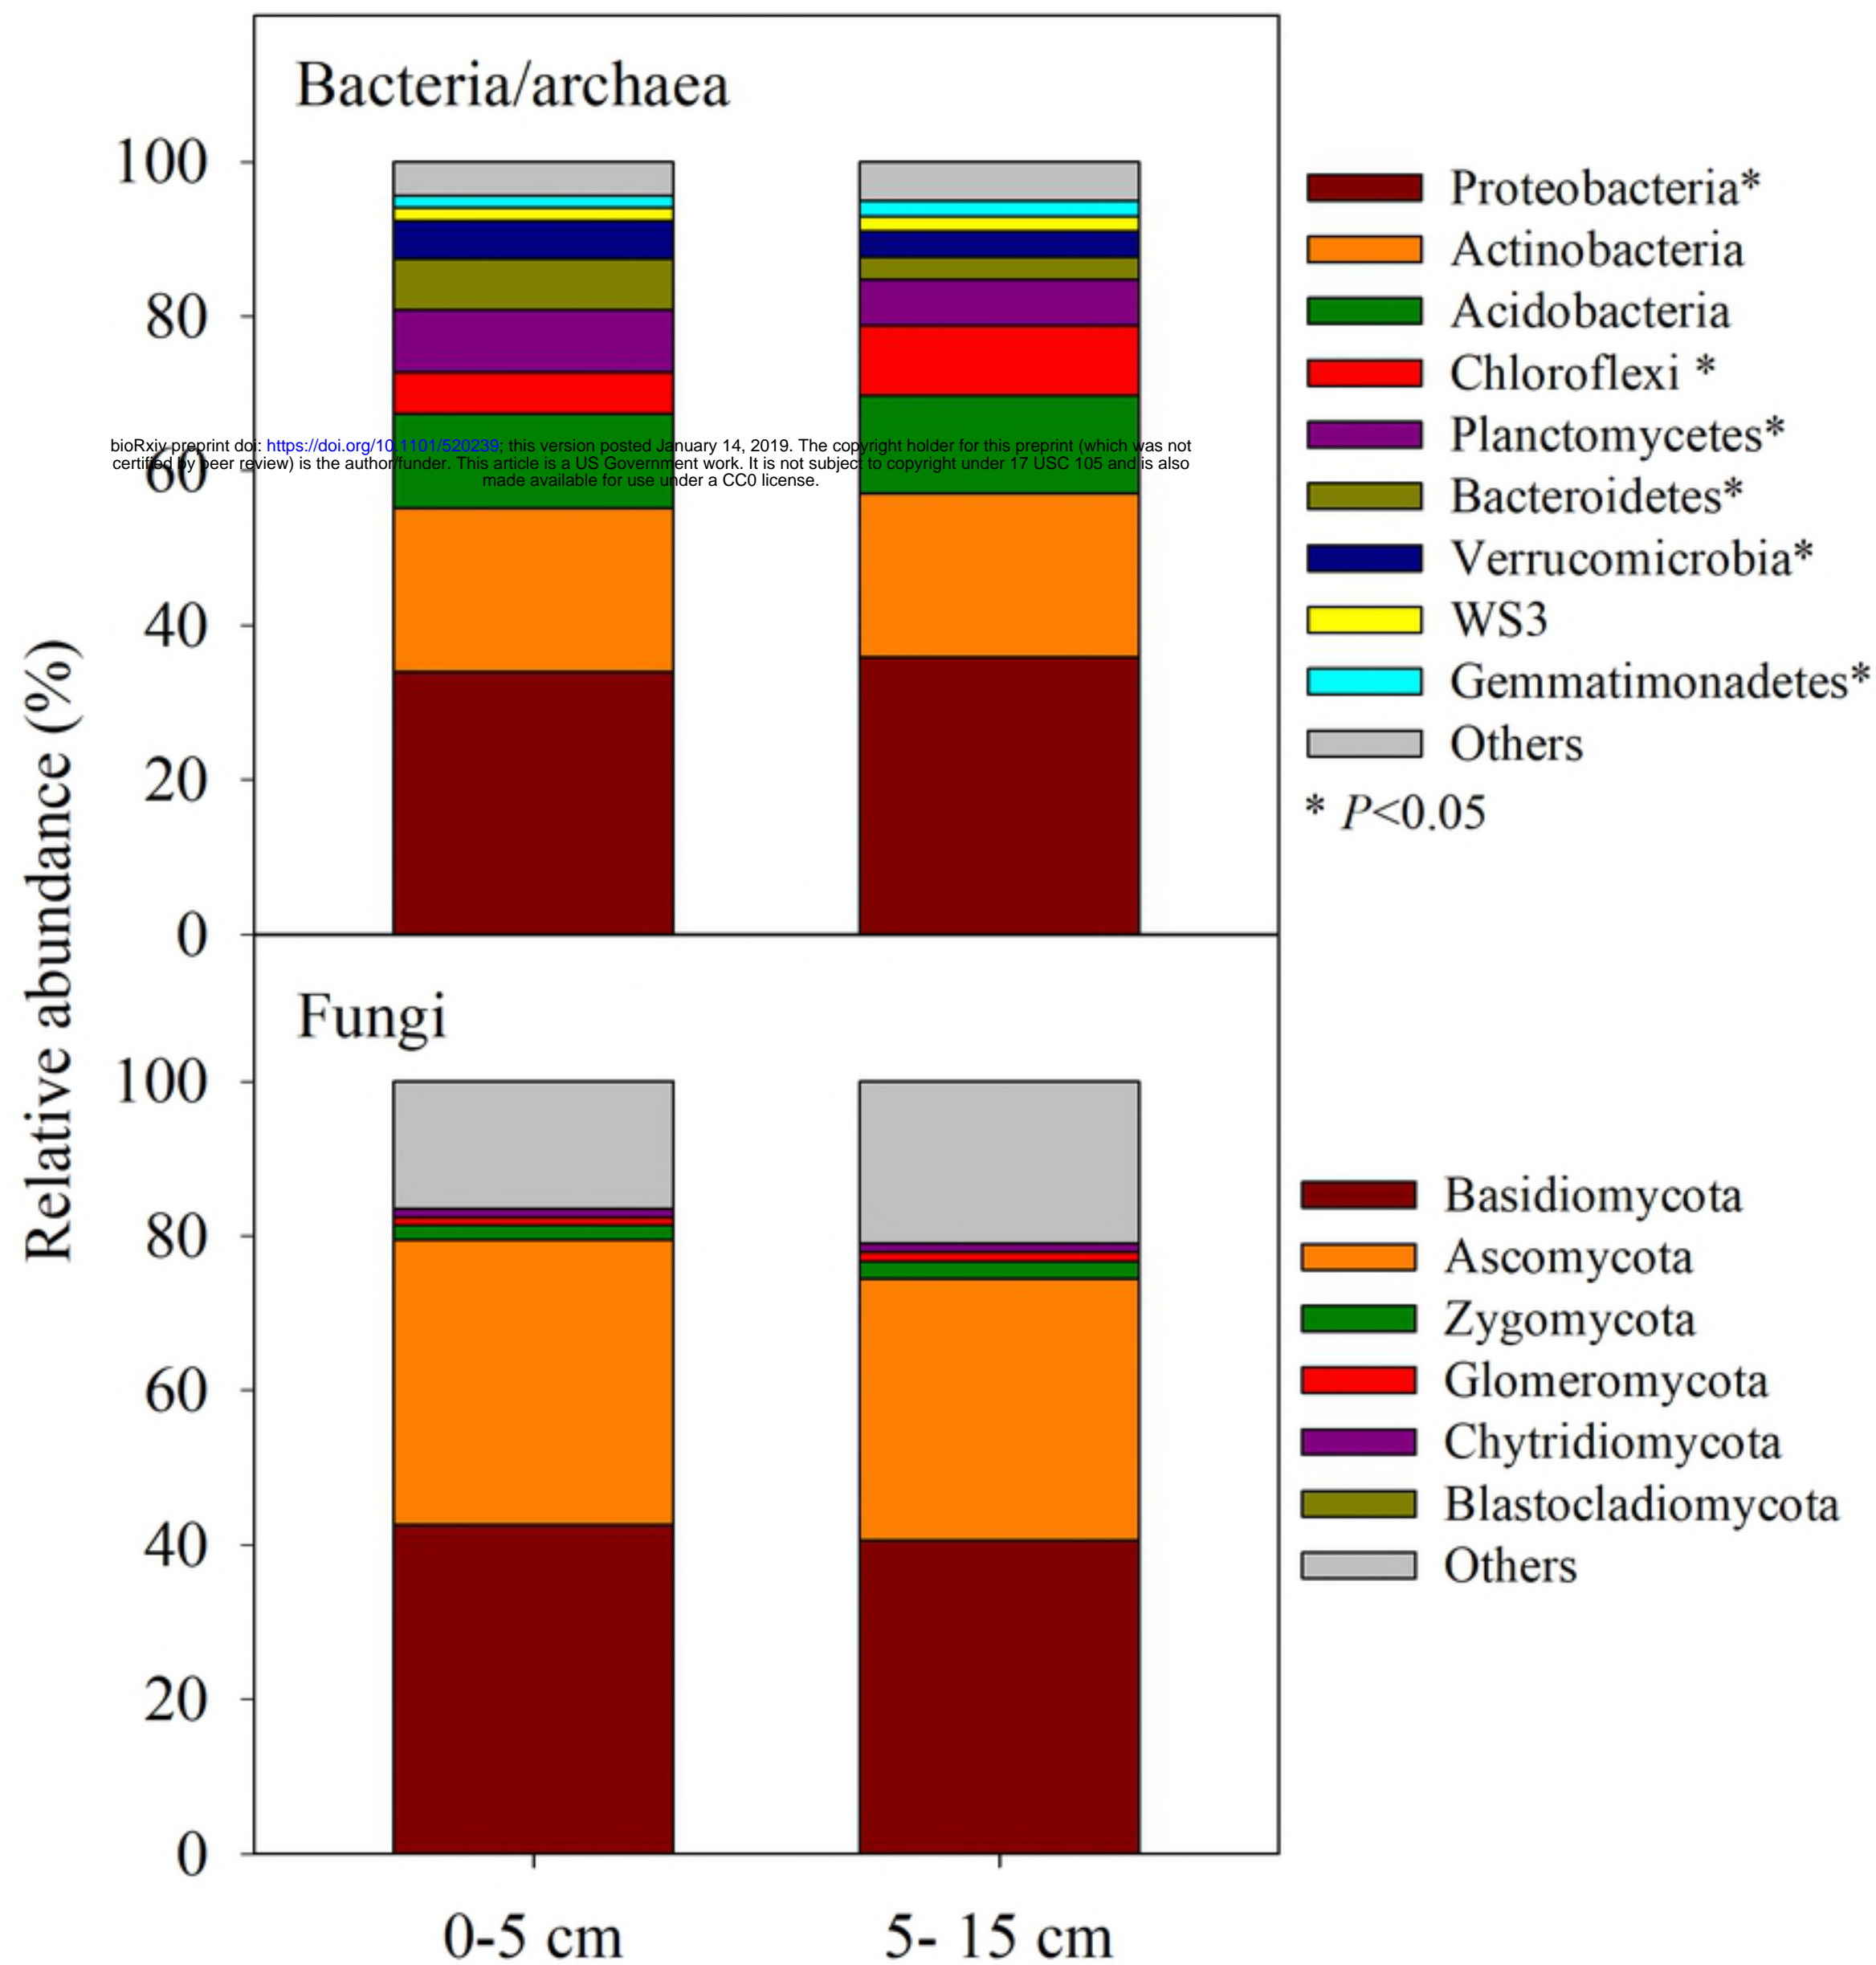

Figure 2

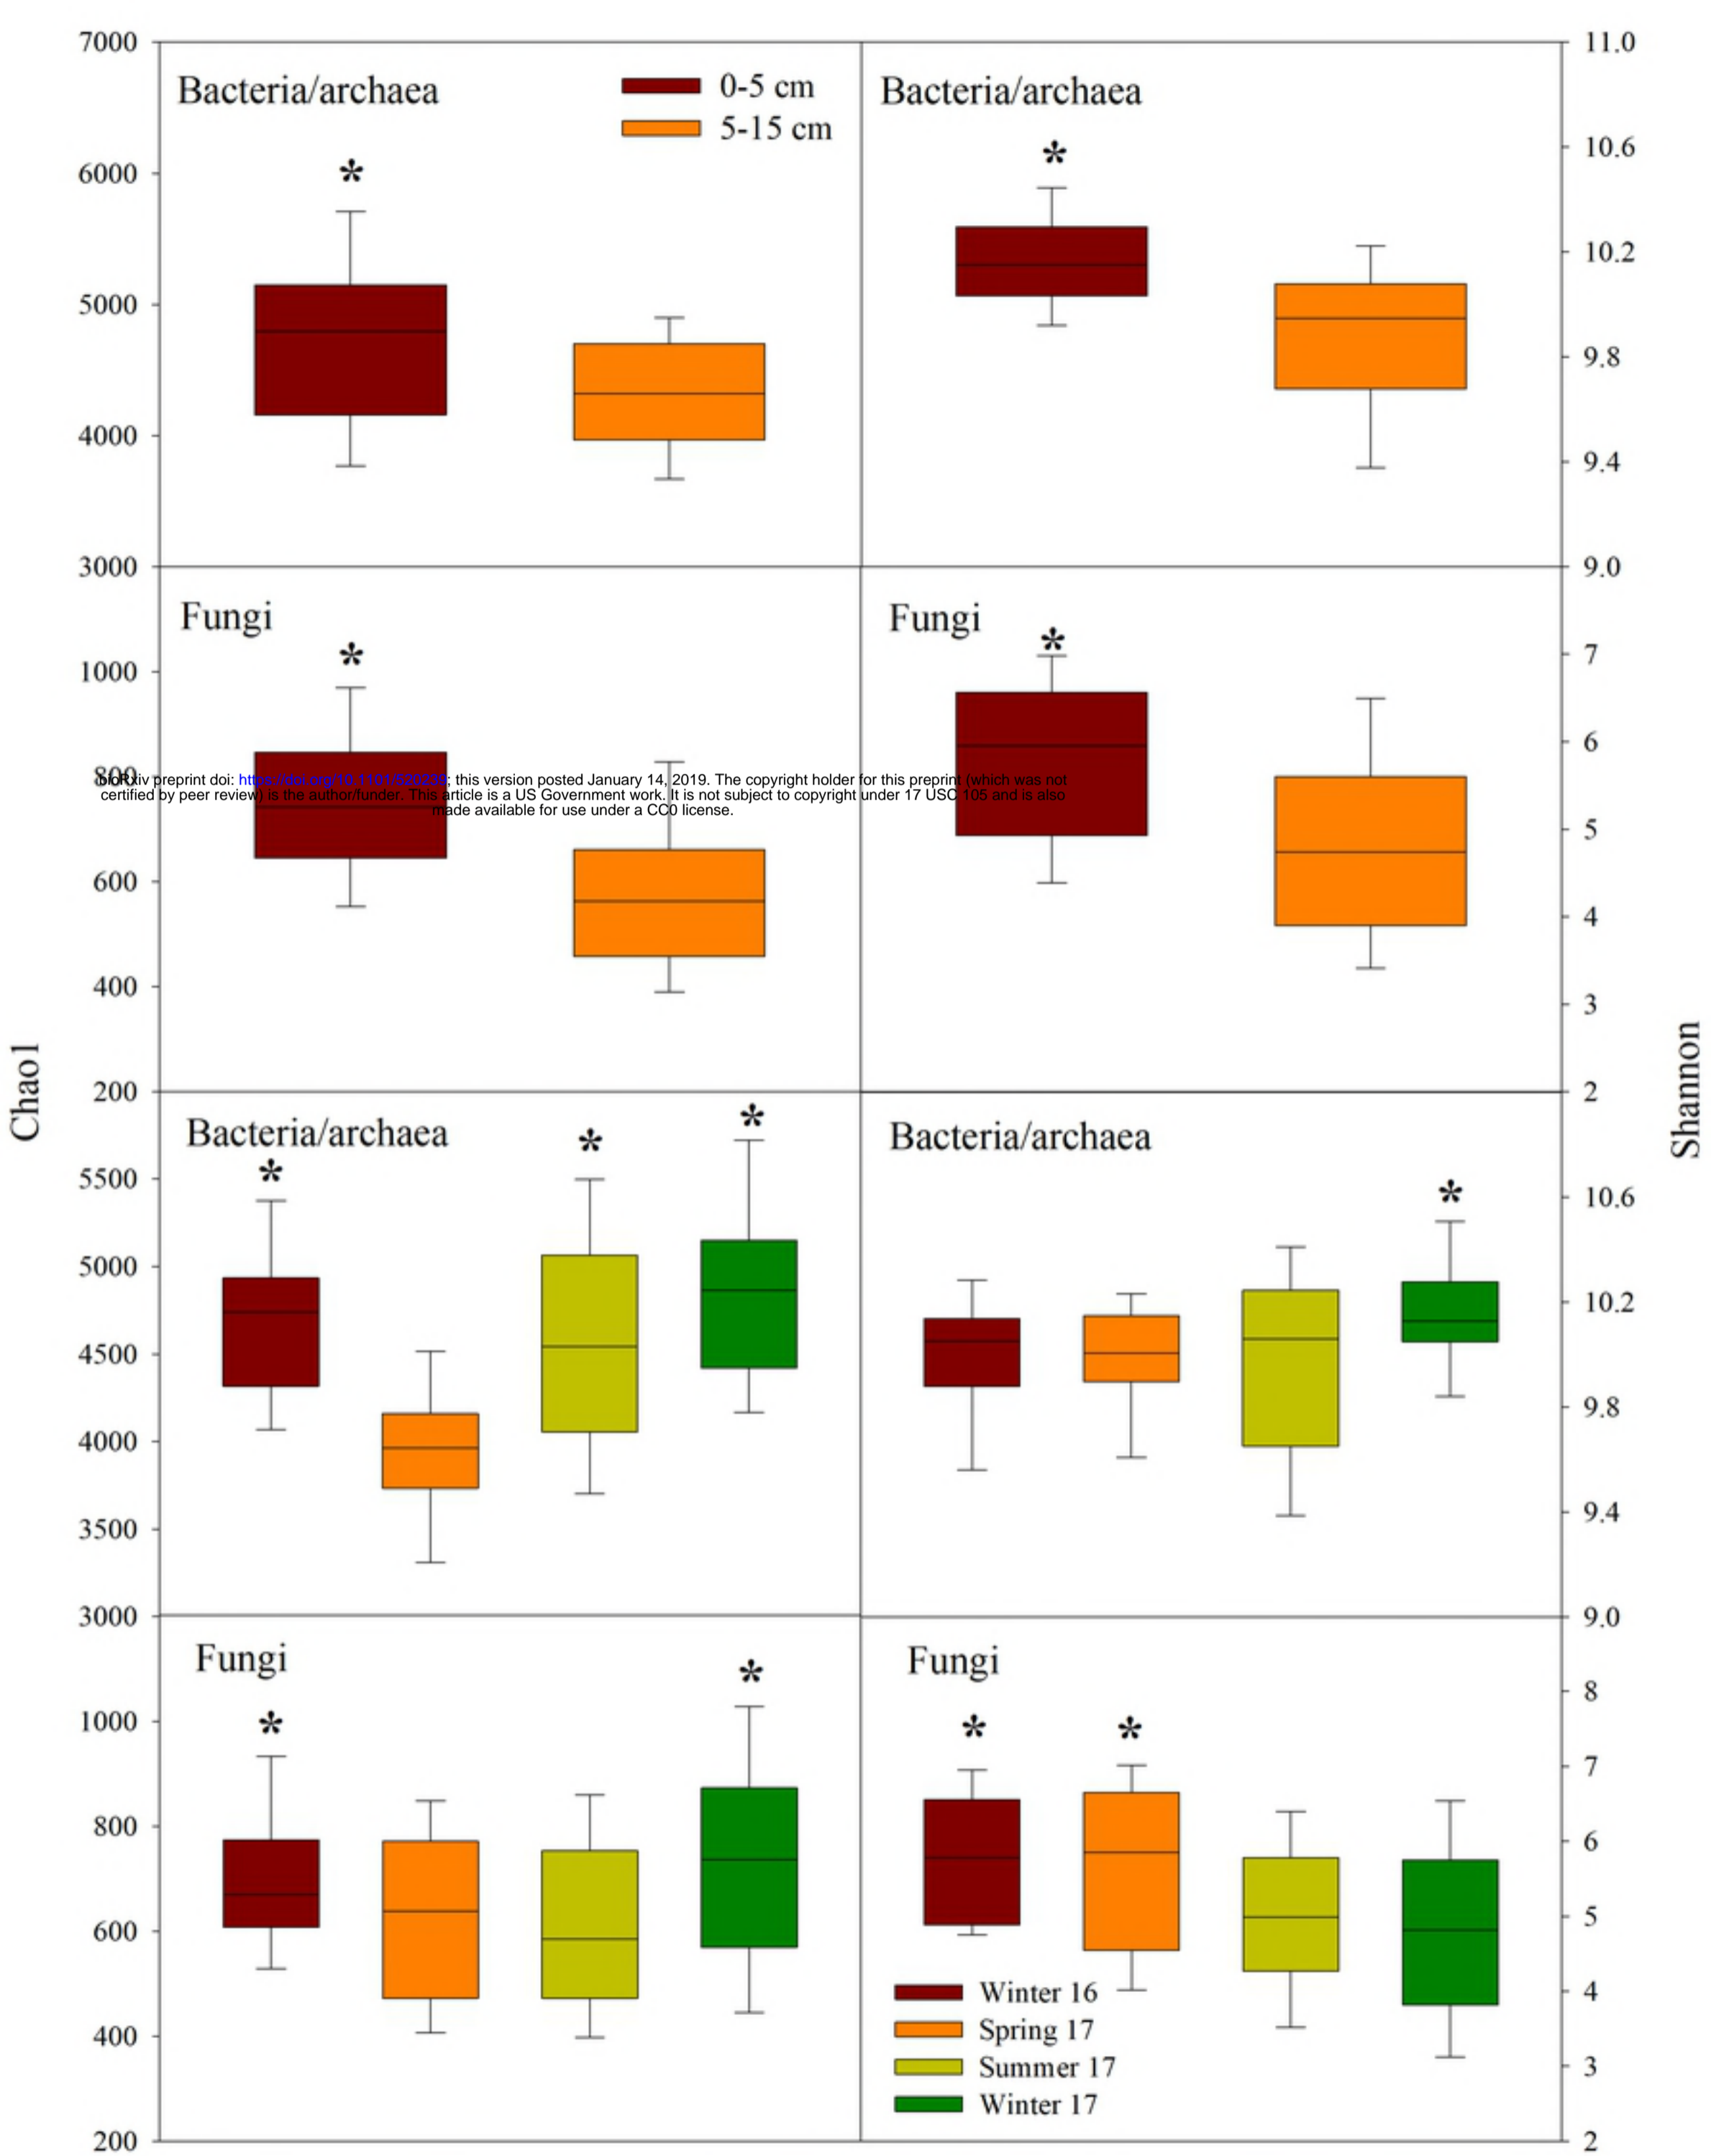

Figure 3



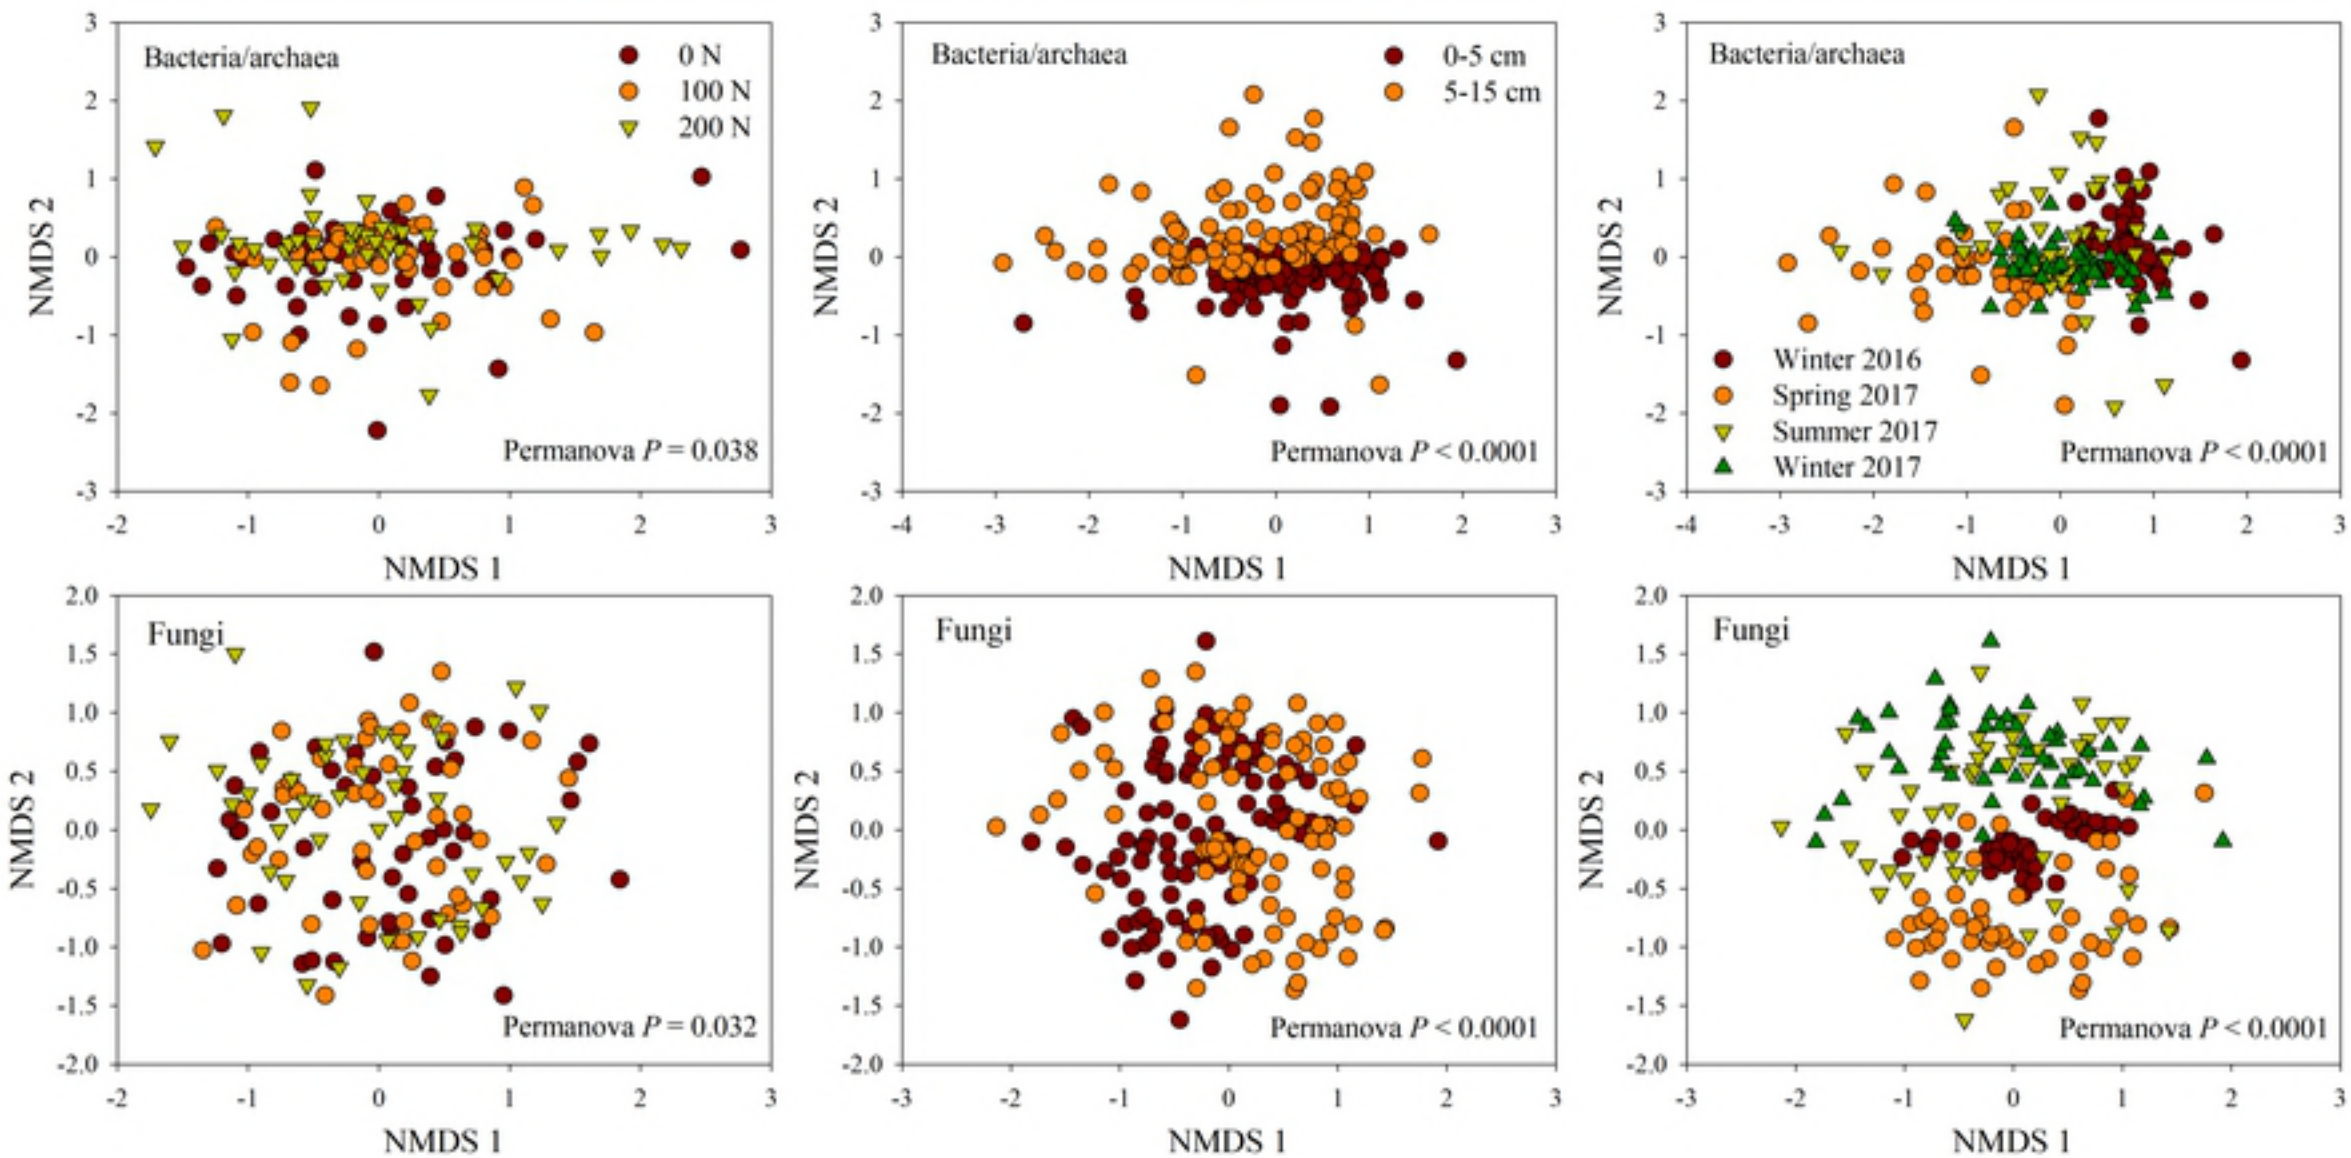

Figure 4

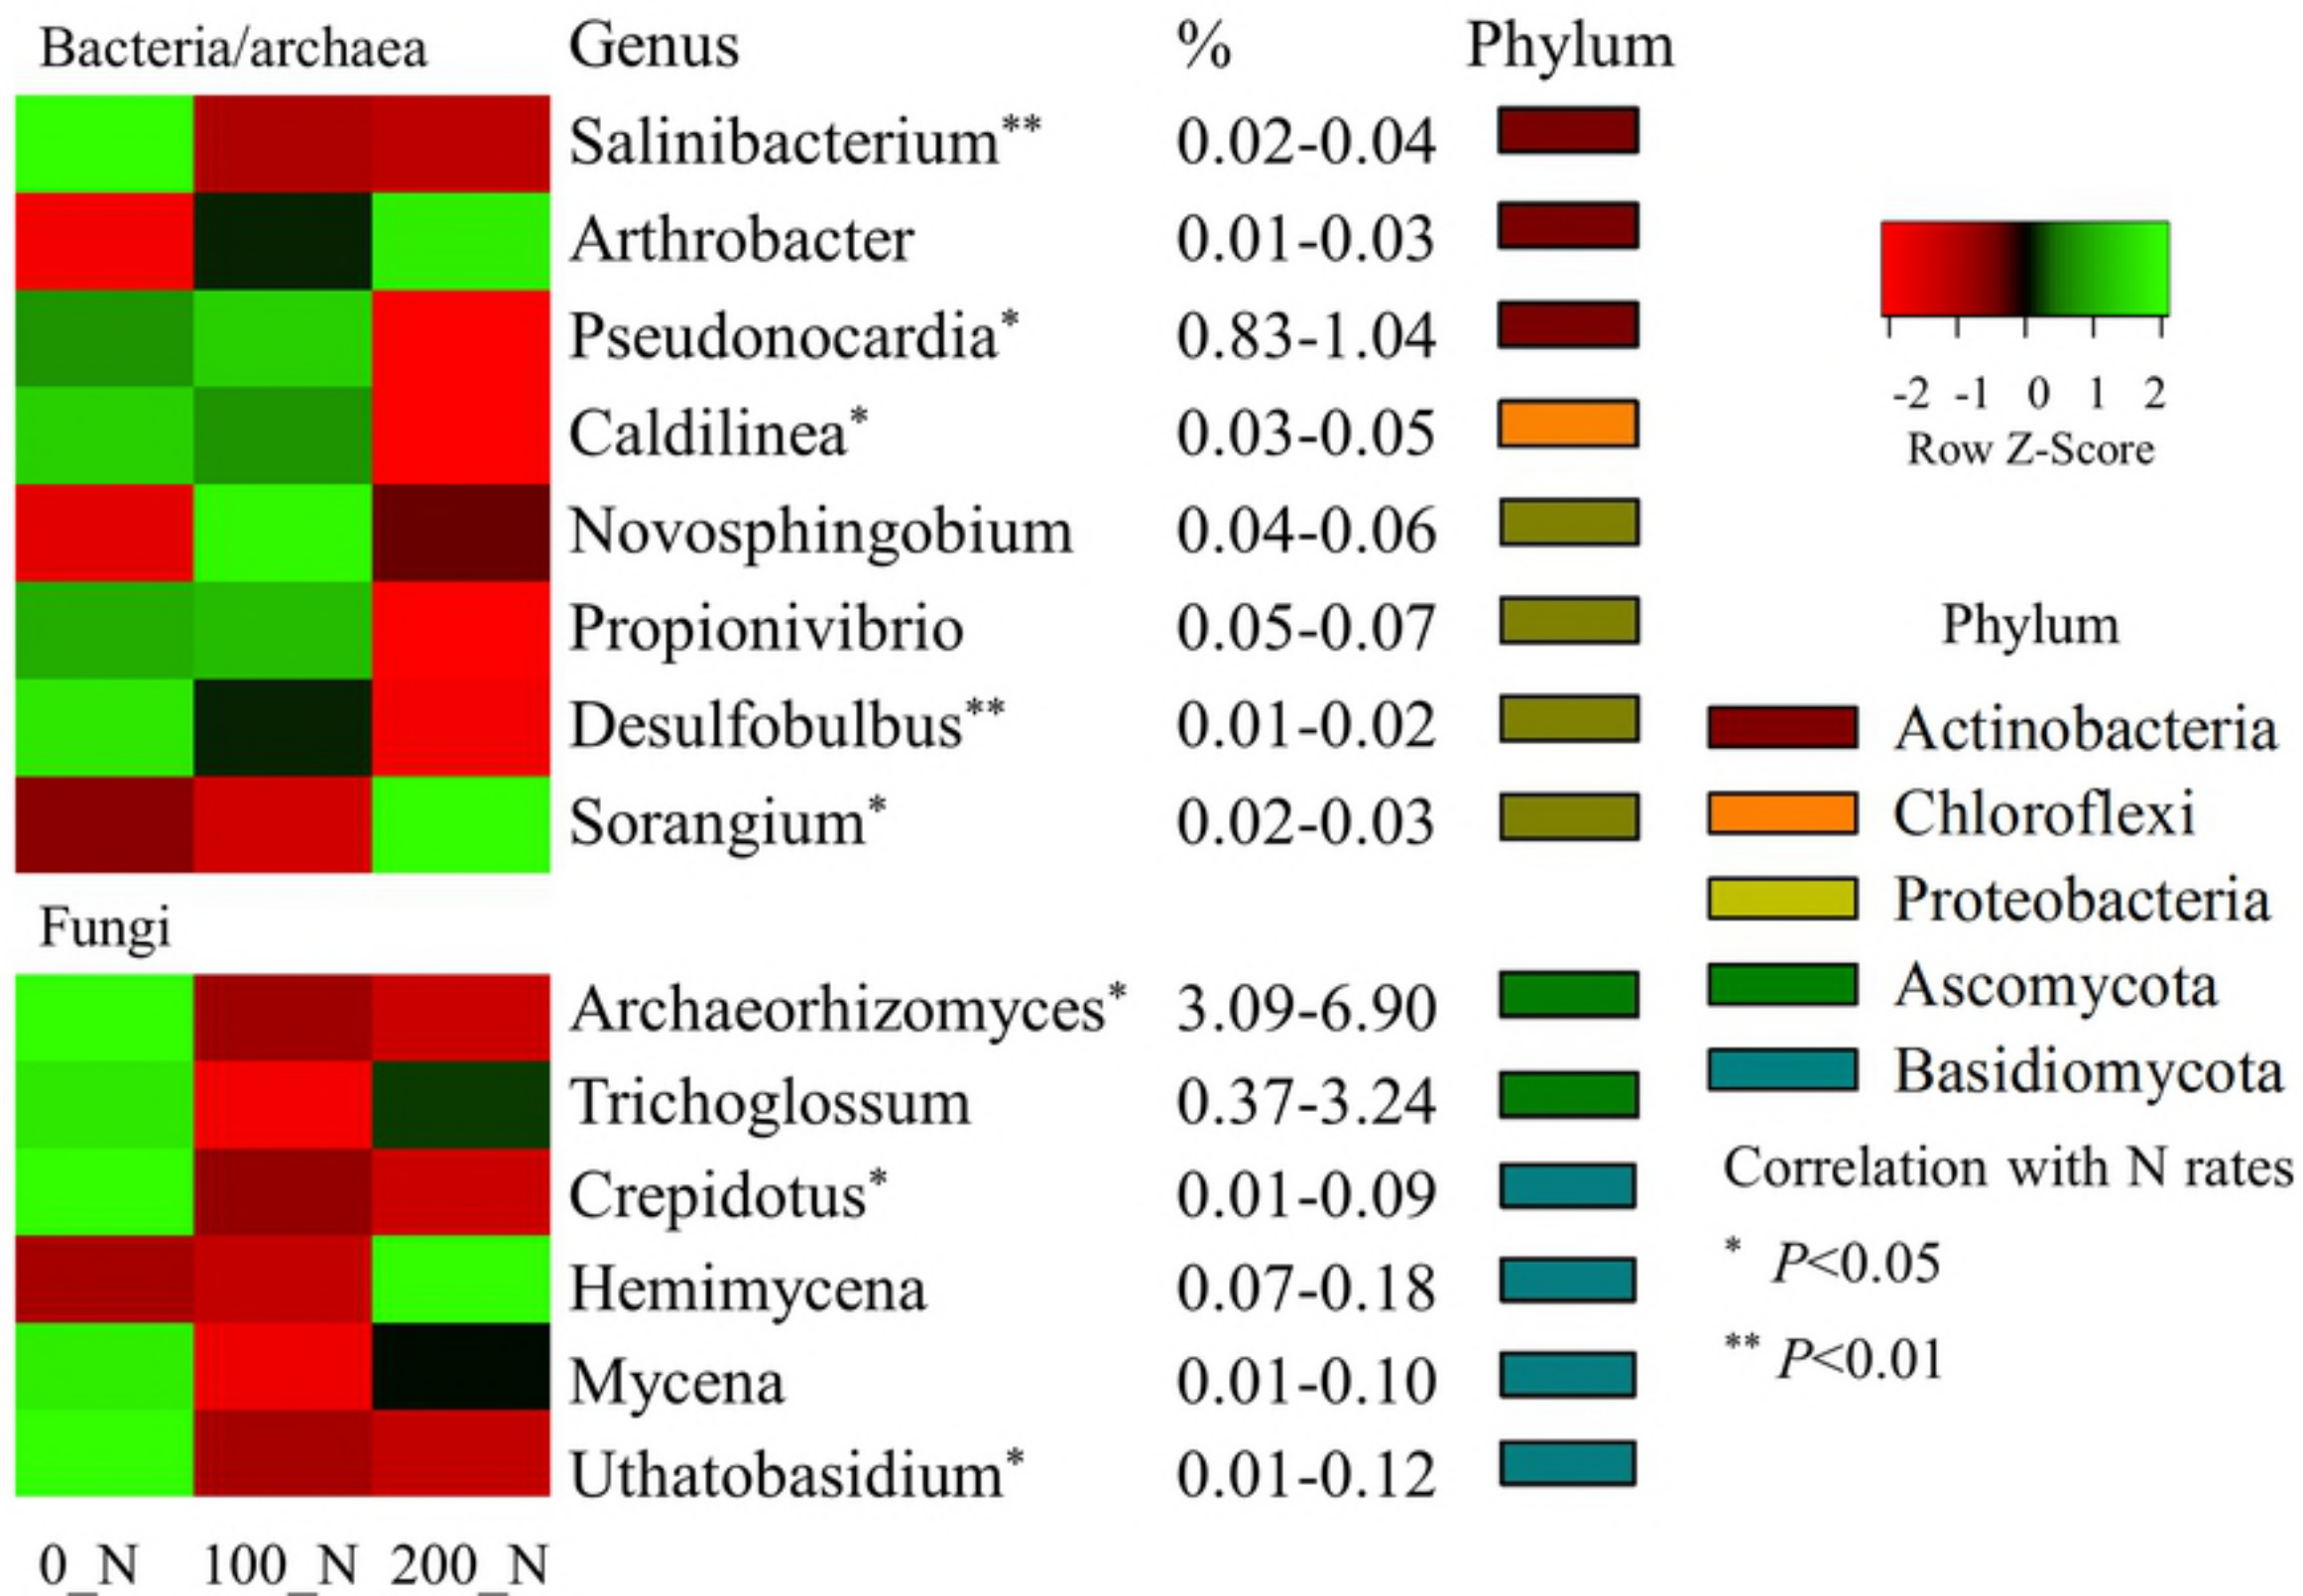

Figure 5

bioRxiv preprint doi: <https://doi.org/10.1101/520239>; this version posted January 14, 2019. The copyright holder for this preprint (which was not certified by peer review) is the author/funder. This article is a US Government work. It is not subject to copyright under 17 USC 105 and is also made available for use under a CC0 license.

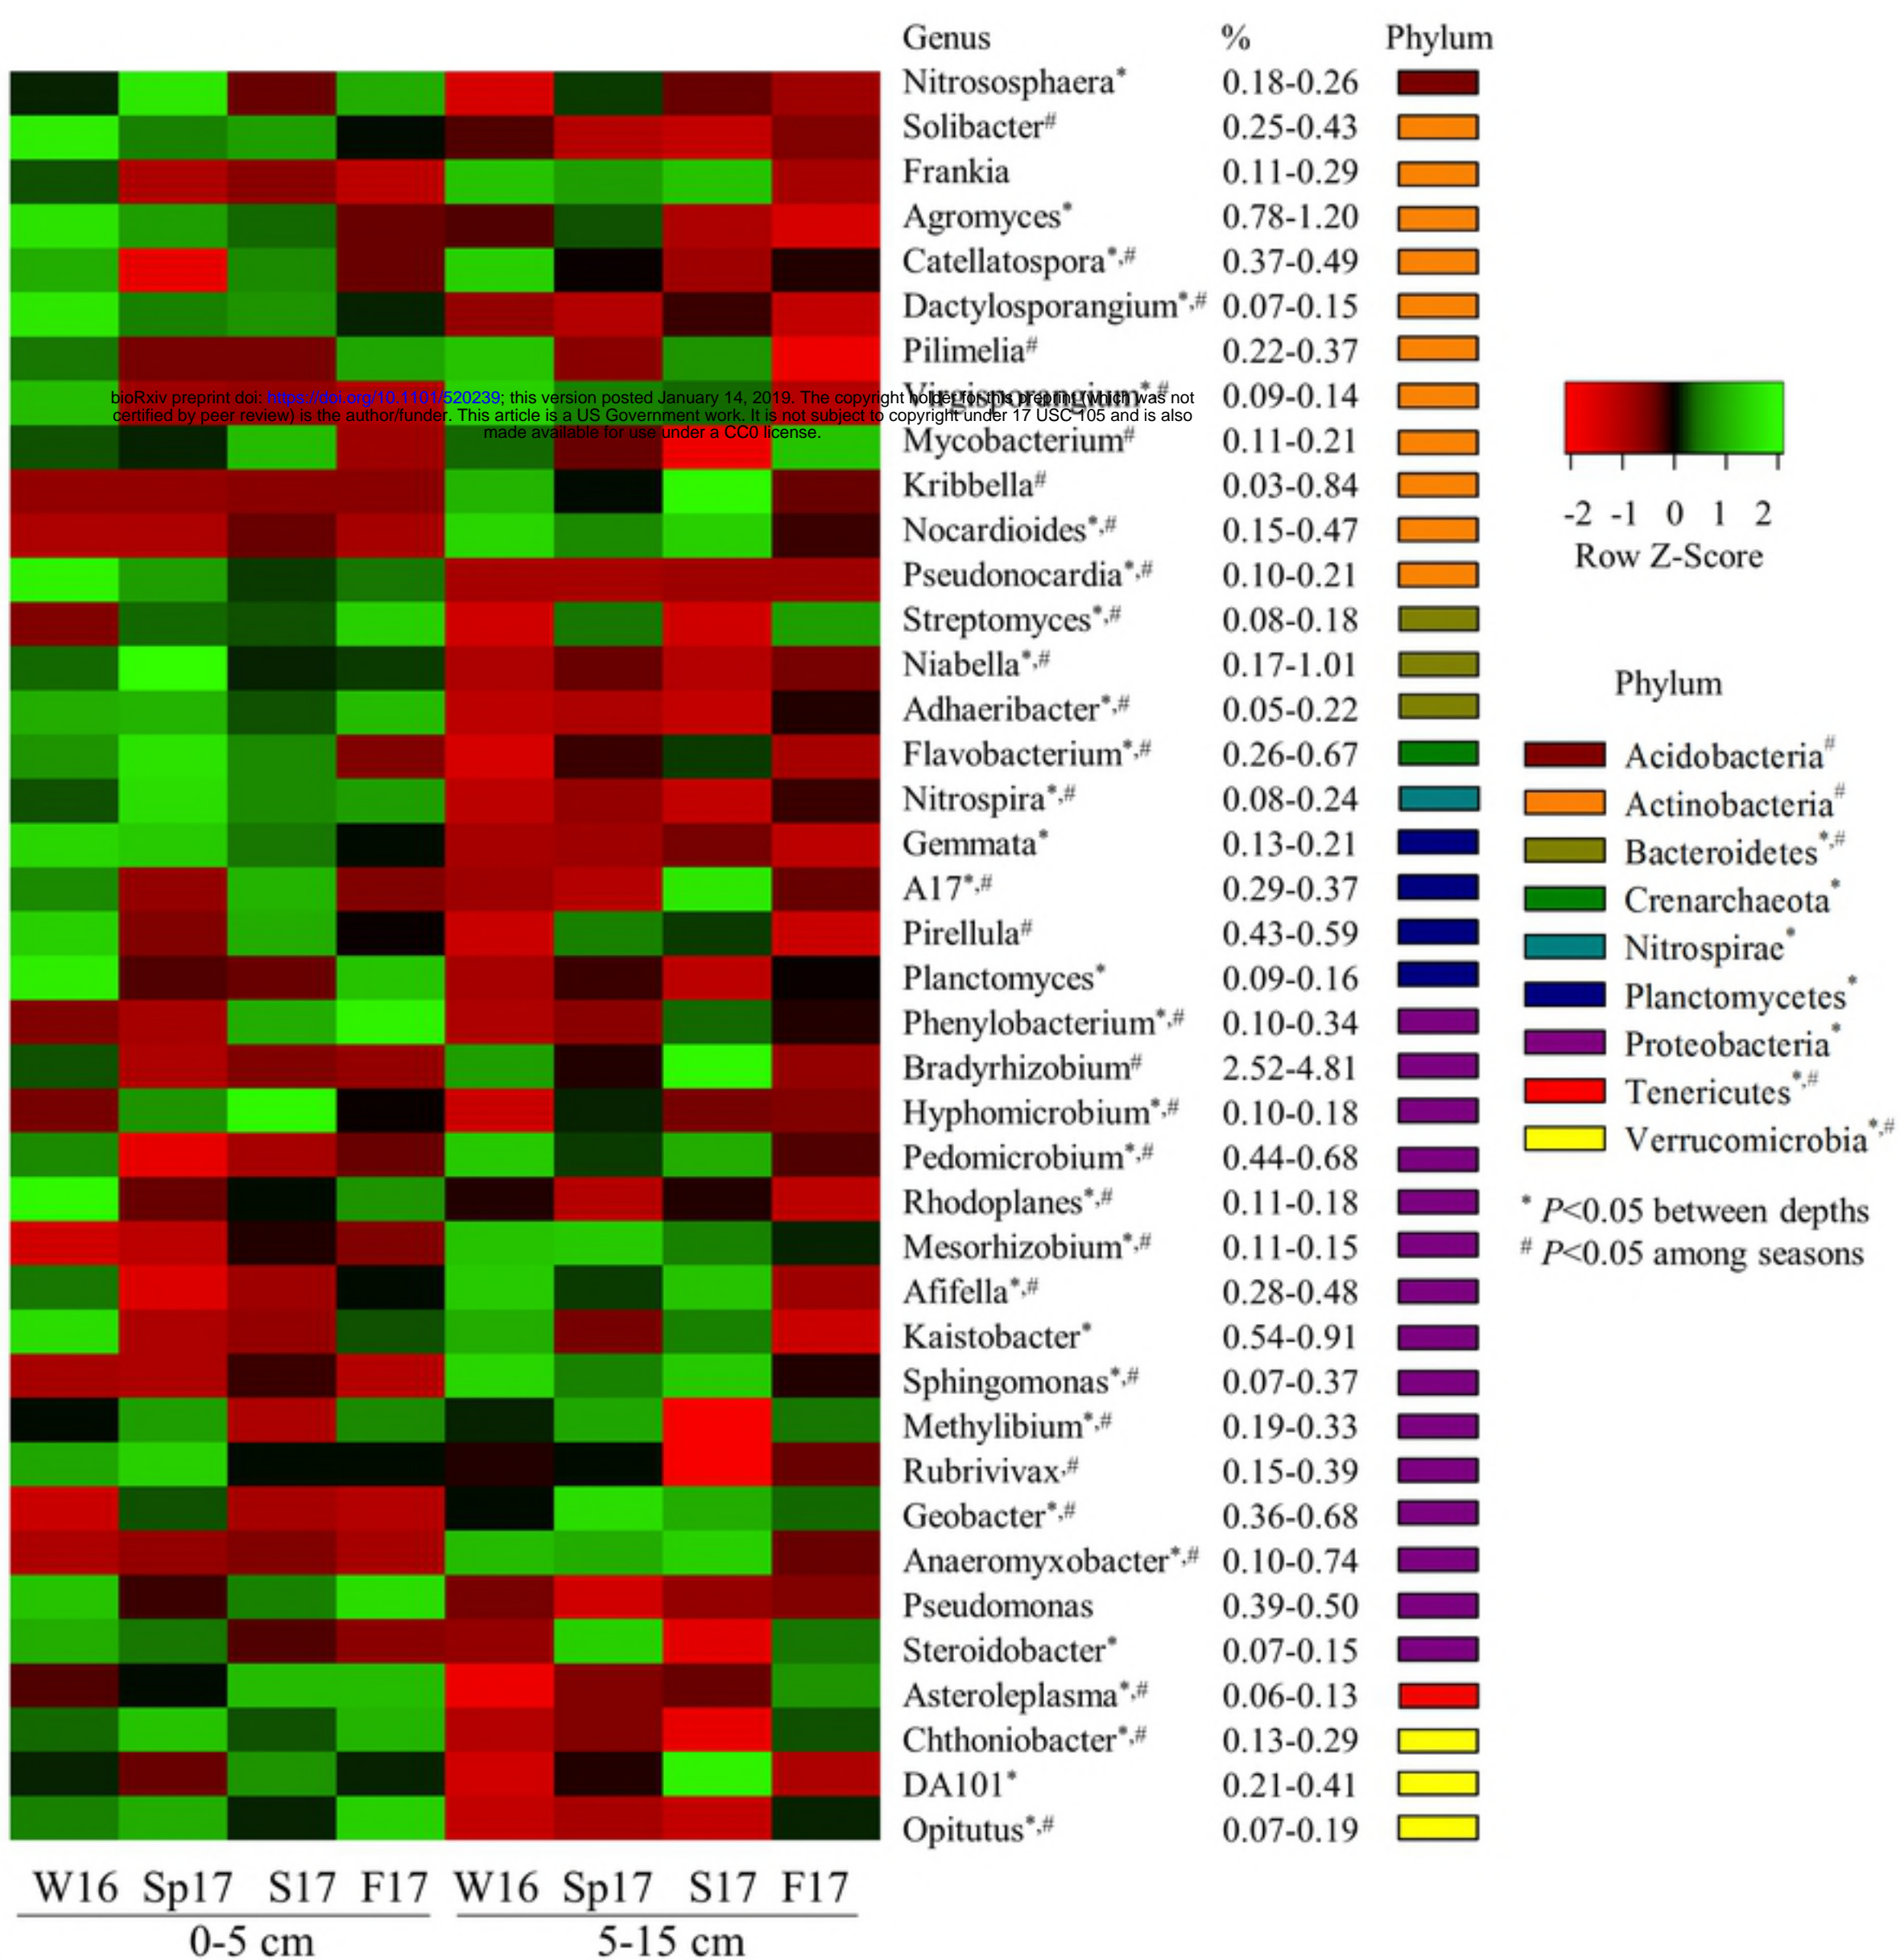

Figure 6

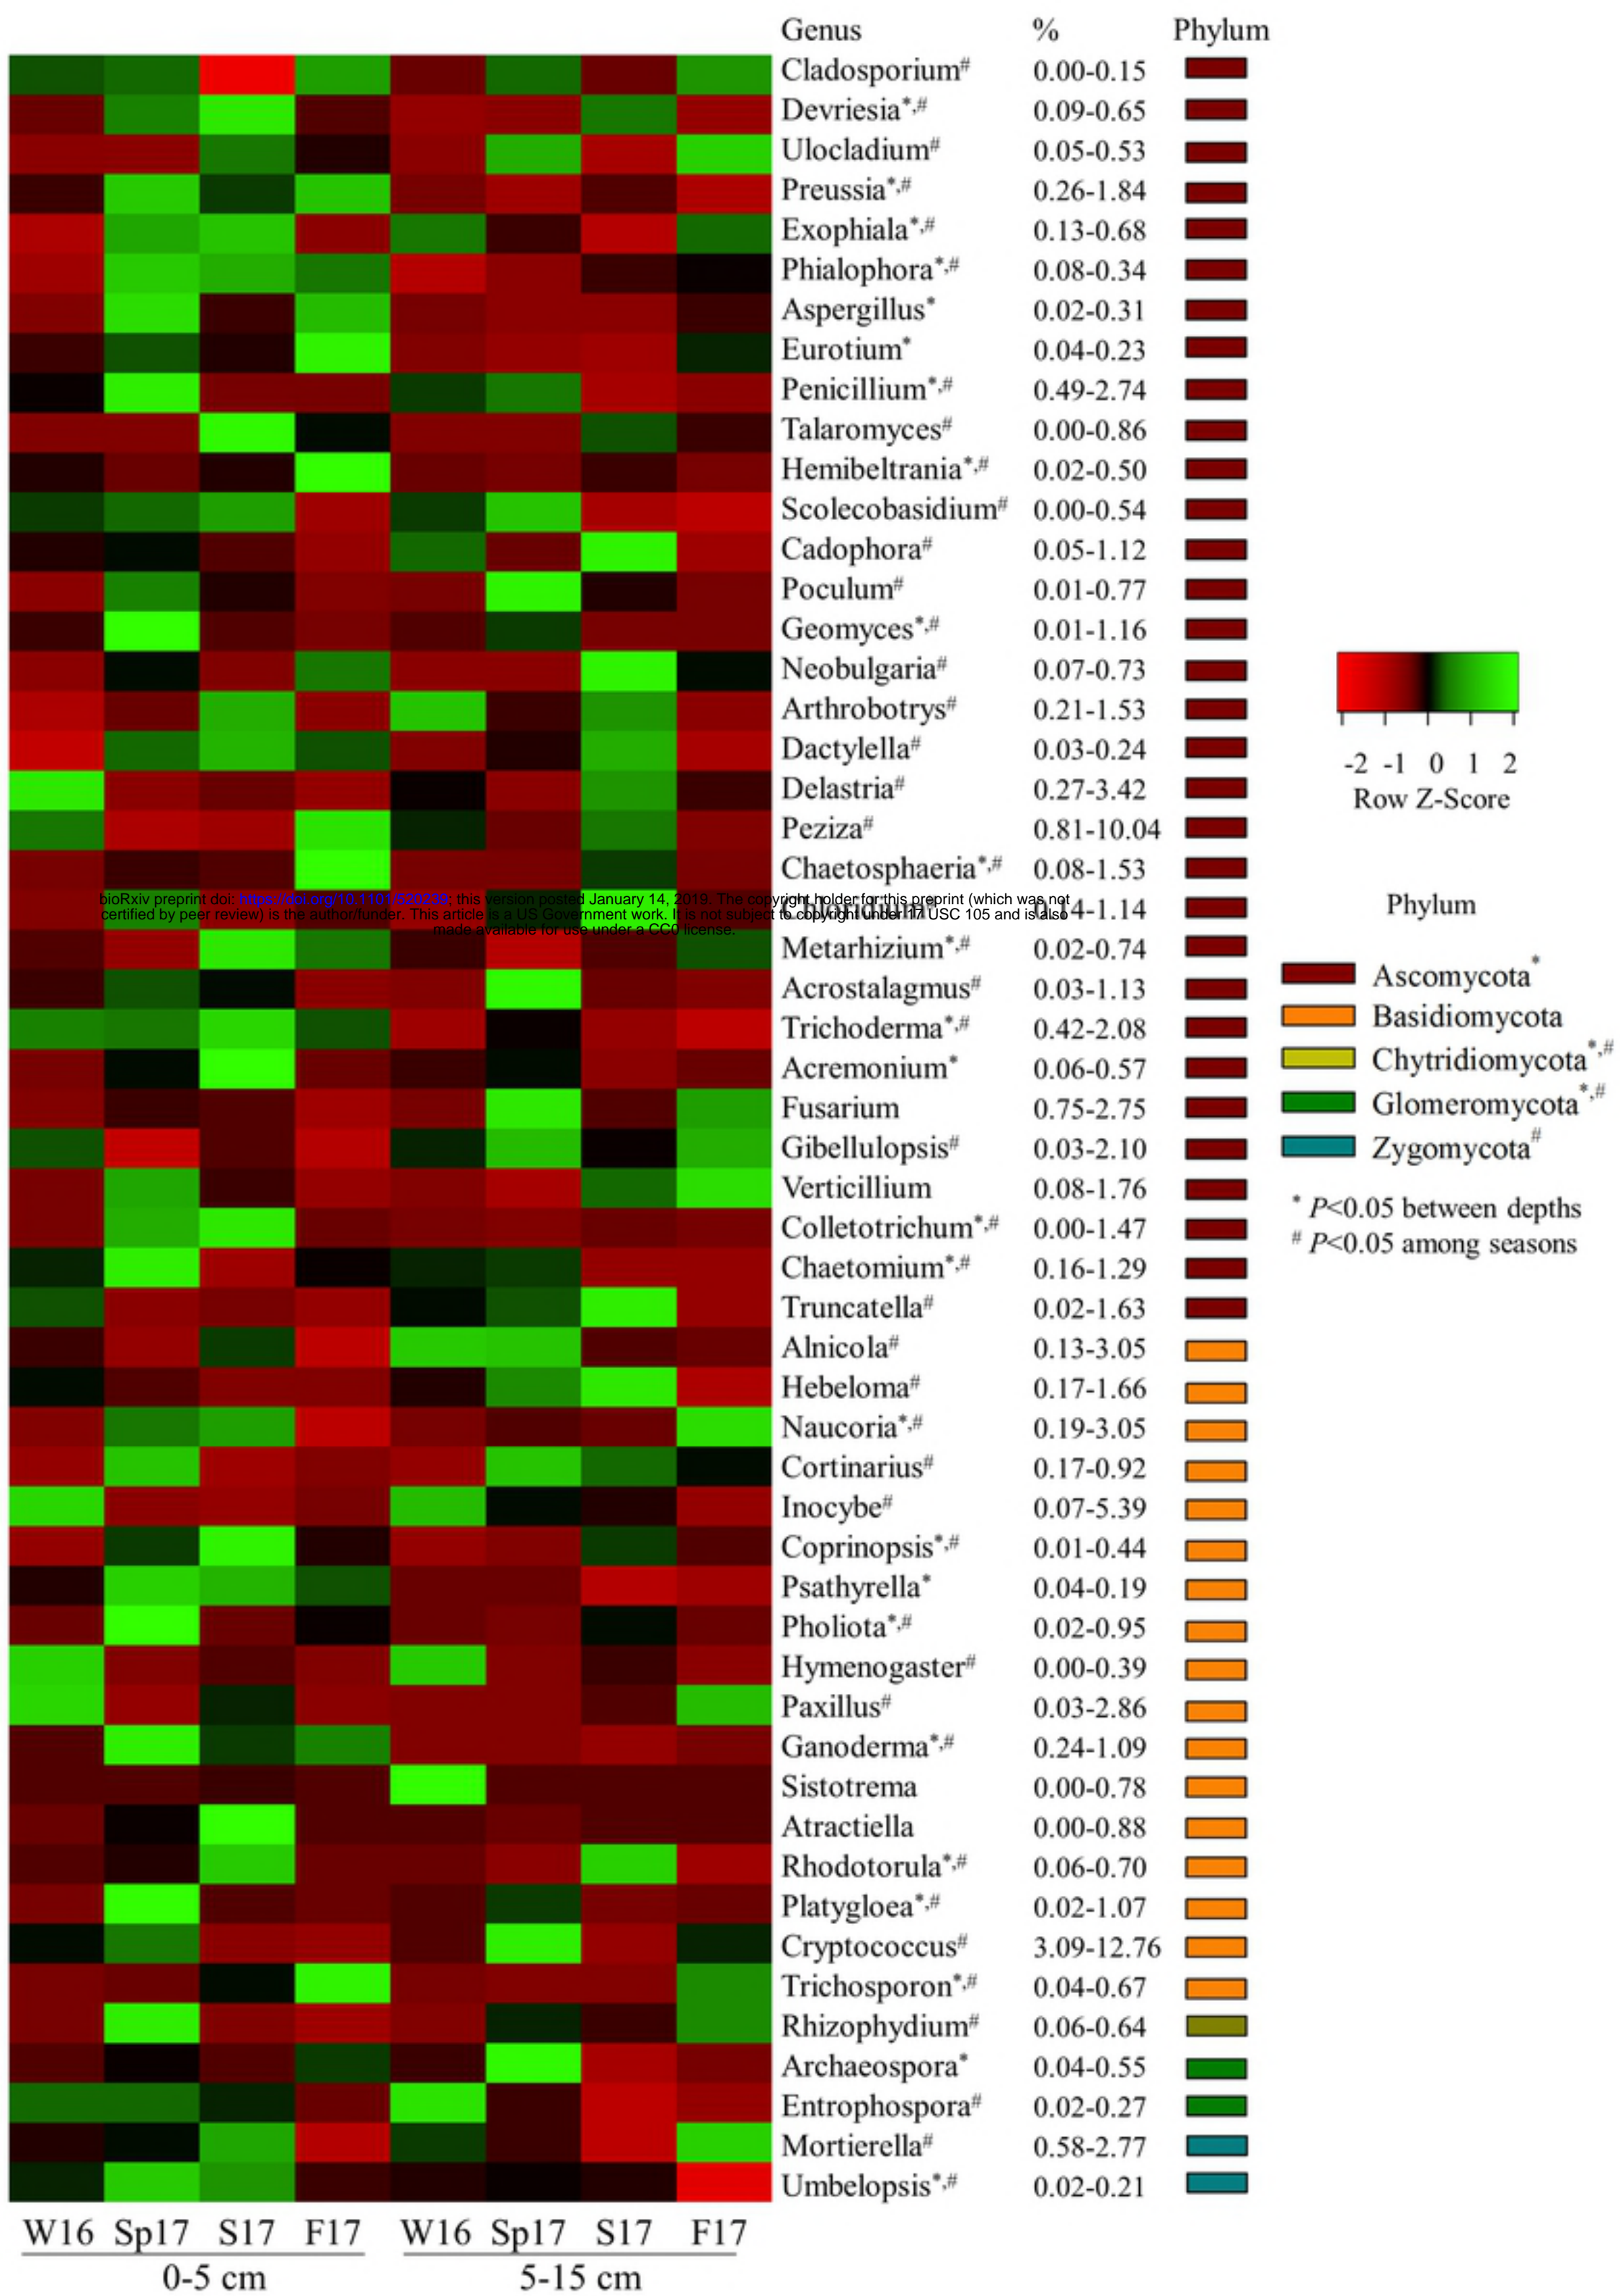

Figure 7

# Soil Depth

# Sampling Season

bioRxiv preprint doi: <https://doi.org/10.1101/520239>; this version posted January 14, 2019. The copyright holder for this preprint (which was not certified by peer review) is the author/funder. This article is a US Government work. It is not subject to copyright under 17 USC 105 and is also made available for use under a CC0 license.

## Bacteria/ archaea

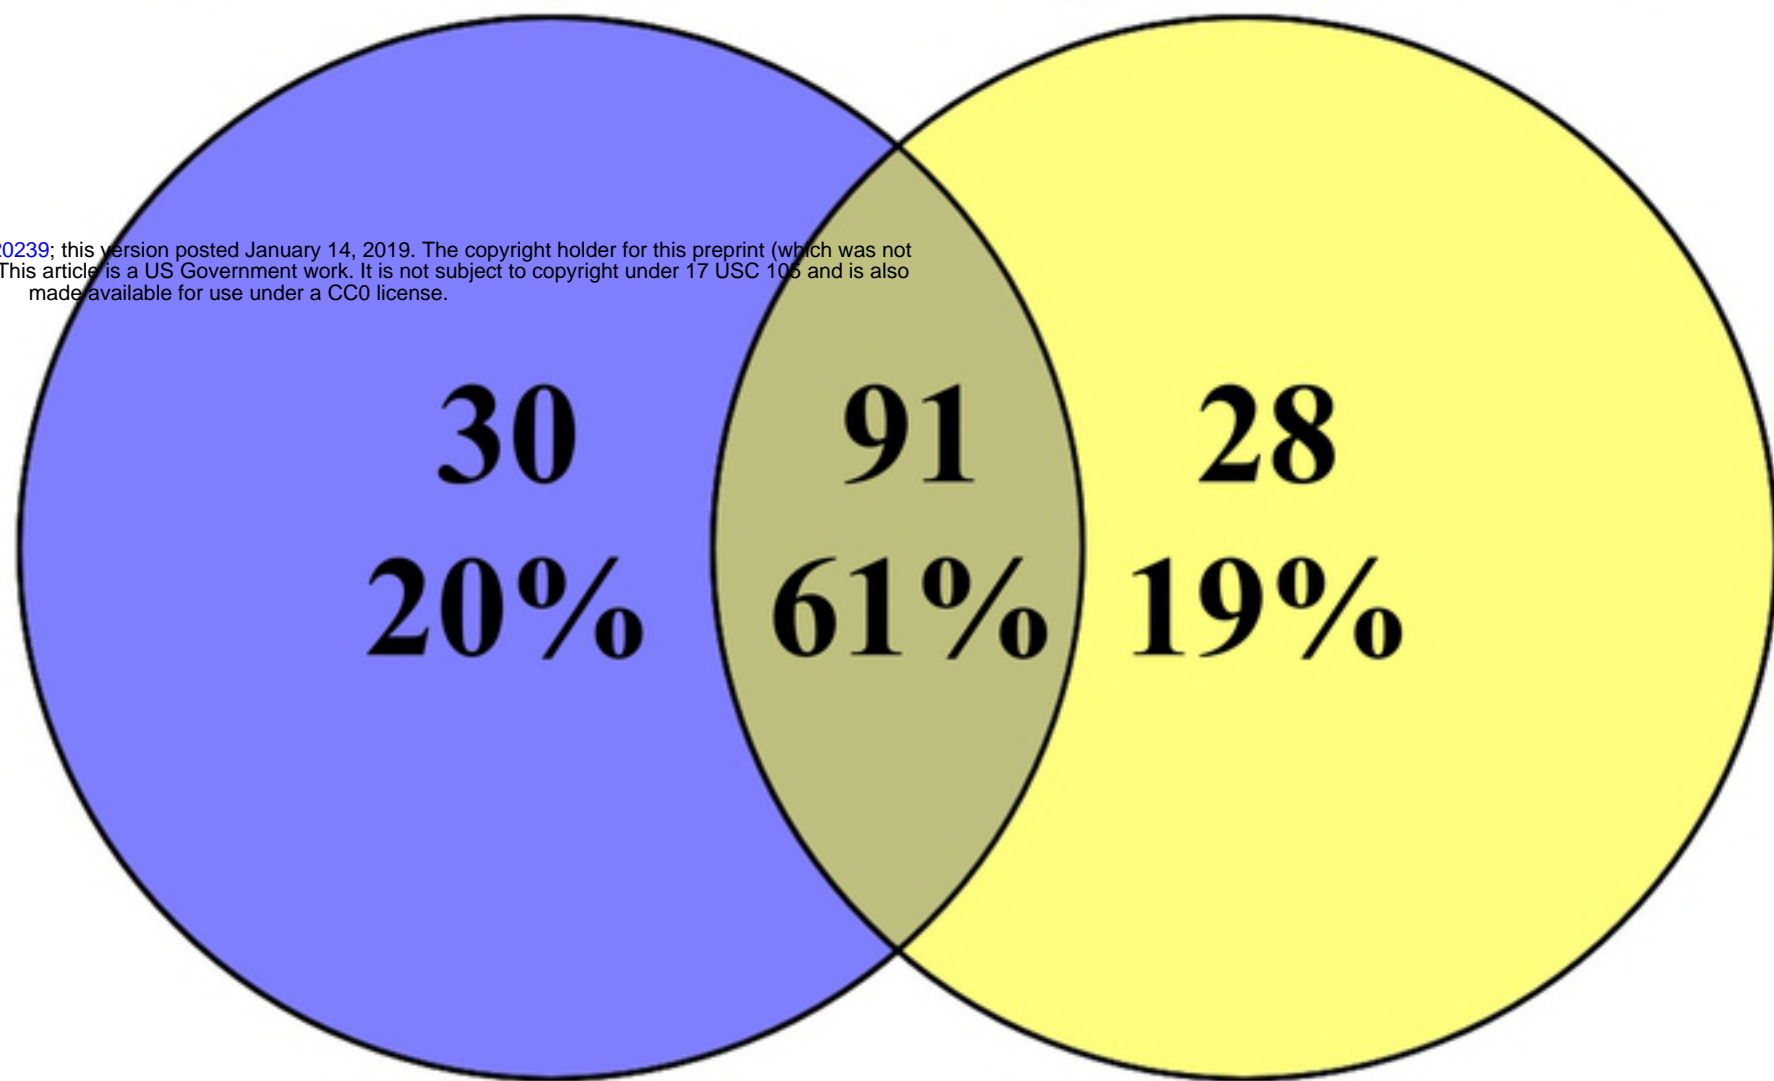

## Fungi

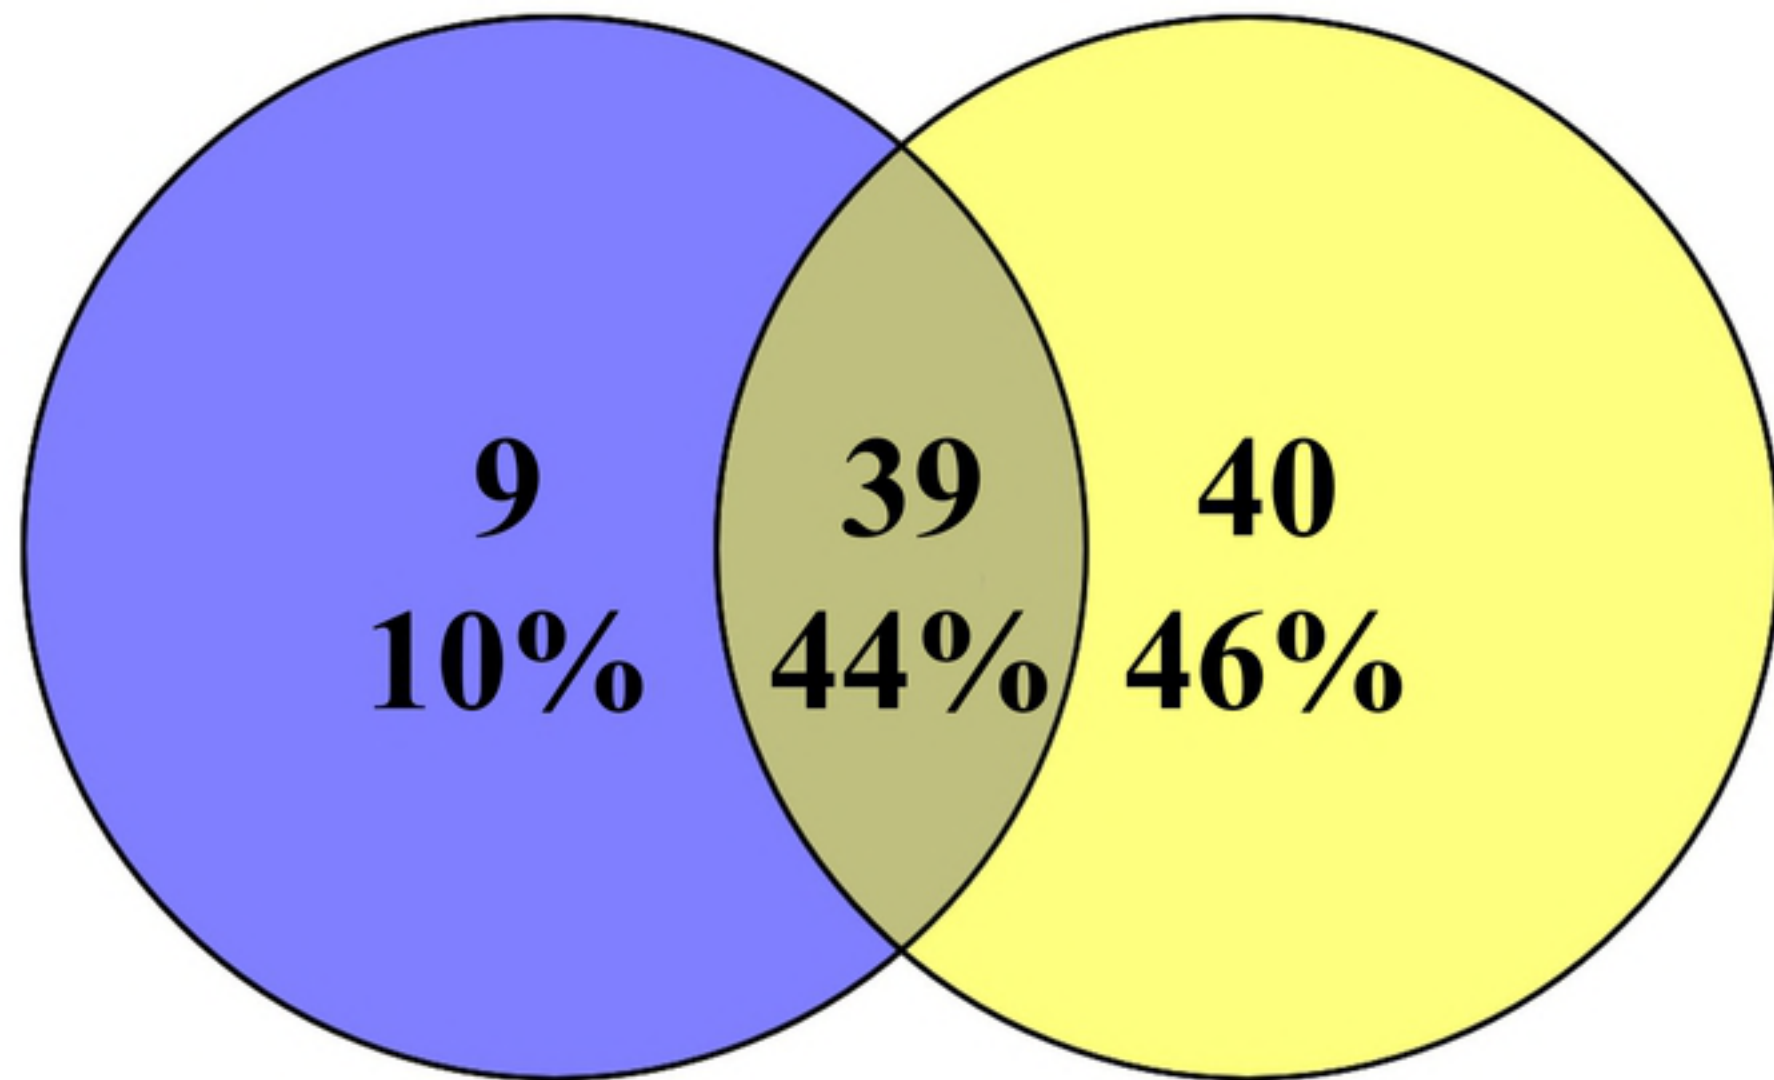

Figure 8
